# Supplementary material for: A Computational Framework to Infer Human Disease-Associated Long Noncoding RNAs
Source: PLoS One. 2014 Jan 2;9(1):e84408. doi: 10.1371/journal.pone.0084408 (PMC3879311; doi:10.1371/journal.pone.0084408)
Supplement: Table S4 — 14213 predicted potential lincRNA-associated diseases for 13966 tissue-specific lincRNAs. (XLS) [file pone.0084408.s004.xls]

## Sheet: Sheet1
LincRNA	Specifically expressed tissue	Related disease
TCONS_00000720	Ovary	Ovary related diseases
TCONS_00000721	Ovary	Ovary related diseases
TCONS_l2_00001979	Liver	Liver related diseases
TCONS_00000360	Whitebloodcell	Whitebloodcell related diseases
TCONS_00001767	HLF_r1	HLF_r1 related diseases
TCONS_l2_00002779	Testes	Testes related diseases
TCONS_00000822	Testes	Testes related diseases
TCONS_00000077	Brain	Brain related diseases
TCONS_00000895	Testes	Testes related diseases
TCONS_00001488	Testes	Testes related diseases
TCONS_l2_00001233	Prostate	Prostate related diseases
TCONS_l2_00001282	Brain	Brain related diseases
TCONS_l2_00002068	Testes	Testes related diseases
TCONS_00000554	Brain	Brain related diseases
TCONS_00001008	Foreskin	Foreskin related diseases
TCONS_00001084	Testes	Testes related diseases
TCONS_00001113	Thyroid	Thyroid related diseases
TCONS_00000350	Whitebloodcell	Whitebloodcell related diseases
TCONS_00000351	Colon	Colon related diseases
TCONS_00000352	Colon	Colon related diseases
TCONS_l2_00002344	Testes	Testes related diseases
TCONS_00001926	Testes	Testes related diseases
TCONS_00000823	Testes_R	Testes_R related diseases
TCONS_00001381	Testes	Testes related diseases
TCONS_00001382	Testes	Testes related diseases
TCONS_l2_00002422	Testes_R	Testes_R related diseases
TCONS_l2_00001000	Testes_R	Testes_R related diseases
TCONS_00000464	Brain	Brain related diseases
TCONS_00001386	Liver	Liver related diseases
TCONS_00001387	Testes	Testes related diseases
TCONS_00001389	Brain	Brain related diseases
TCONS_00000841	Testes	Testes related diseases
TCONS_00001395	Thyroid	Thyroid related diseases
TCONS_00000846	LymphNode	LymphNode related diseases
TCONS_00001408	Testes	Testes related diseases
TCONS_00001409	Testes	Testes related diseases
TCONS_00001415	Heart	Heart related diseases
TCONS_00000864	Testes	Testes related diseases
TCONS_00000866	LymphNode	LymphNode related diseases
TCONS_00000867	Colon	Colon related diseases
TCONS_00001425	Testes_R	Testes_R related diseases
TCONS_00001961	Testes_R	Testes_R related diseases
TCONS_00000168	Testes_R	Testes_R related diseases
TCONS_00000877	Testes_R	Testes_R related diseases
TCONS_00000497	Testes	Testes related diseases
TCONS_l2_00002021	Testes_R	Testes_R related diseases
TCONS_00000501	Ovary	Ovary related diseases
TCONS_00001449	Lung	Lung related diseases
TCONS_00000502	Prostate	Prostate related diseases
TCONS_00001451	Testes	Testes related diseases
TCONS_00001454	Testes	Testes related diseases
TCONS_00000887	Testes_R	Testes_R related diseases
TCONS_00001468	Testes_R	Testes_R related diseases
TCONS_l2_00002032	Testes	Testes related diseases
TCONS_l2_00000244	Testes	Testes related diseases
TCONS_00001475	Testes_R	Testes_R related diseases
TCONS_00000192	Thyroid	Thyroid related diseases
TCONS_00001483	Kidney	Kidney related diseases
TCONS_00000515	Kidney	Kidney related diseases
TCONS_l2_00002041	Kidney	Kidney related diseases
TCONS_l2_00000270	Kidney	Kidney related diseases
TCONS_00000196	Lung	Lung related diseases
TCONS_00000197	Lung	Lung related diseases
TCONS_00000934	Testes	Testes related diseases
TCONS_00001494	Lung	Lung related diseases
TCONS_00000942	Liver	Liver related diseases
TCONS_00000522	Testes	Testes related diseases
TCONS_00000200	Liver	Liver related diseases
TCONS_00000947	Testes	Testes related diseases
TCONS_00000949	Kidney	Kidney related diseases
TCONS_00000952	Thyroid	Thyroid related diseases
TCONS_00001499	Thyroid	Thyroid related diseases
TCONS_00000208	Testes	Testes related diseases
TCONS_00001503	Breast	Breast related diseases
TCONS_00000964	Testes	Testes related diseases
TCONS_00000213	Testes	Testes related diseases
TCONS_00000965	Testes	Testes related diseases
TCONS_00000966	Kidney	Kidney related diseases
TCONS_00000967	Testes	Testes related diseases
TCONS_00000968	Ovary	Ovary related diseases
TCONS_00000534	Testes	Testes related diseases
TCONS_00000533	Testes	Testes related diseases
TCONS_00000532	Testes	Testes related diseases
TCONS_00000218	Testes	Testes related diseases
TCONS_00000970	Heart	Heart related diseases
TCONS_00001522	Testes_R	Testes_R related diseases
TCONS_l2_00000323	Testes	Testes related diseases
TCONS_00000544	Testes	Testes related diseases
TCONS_00000221	Testes	Testes related diseases
TCONS_00001523	Testes	Testes related diseases
TCONS_00000976	Kidney	Kidney related diseases
TCONS_00000984	Testes	Testes related diseases
TCONS_l2_00002080	Thyroid	Thyroid related diseases
TCONS_l2_00000337	Thyroid	Thyroid related diseases
TCONS_l2_00002081	Thyroid	Thyroid related diseases
TCONS_00001527	Prostate	Prostate related diseases
TCONS_00001528	Testes	Testes related diseases
TCONS_00001534	Testes	Testes related diseases
TCONS_00001550	Testes_R	Testes_R related diseases
TCONS_00001009	Lung	Lung related diseases
TCONS_00001557	Testes	Testes related diseases
TCONS_00001014	Brain	Brain related diseases
TCONS_00001017	Adrenal	Adrenal related diseases
TCONS_00001568	Whitebloodcell	Whitebloodcell related diseases
TCONS_00000561	Adrenal	Adrenal related diseases
TCONS_00000247	Testes	Testes related diseases
TCONS_00000574	Kidney	Kidney related diseases
TCONS_00001045	Testes	Testes related diseases
TCONS_00001052	Adipose	Adipose related diseases
TCONS_00001602	Testes	Testes related diseases
TCONS_00001604	Lung	Lung related diseases
TCONS_00001081	Thyroid	Thyroid related diseases
TCONS_00001082	Testes	Testes related diseases
TCONS_00001083	Testes	Testes related diseases
TCONS_00001617	Testes	Testes related diseases
TCONS_00002424	Testes	Testes related diseases
TCONS_00000600	Whitebloodcell	Whitebloodcell related diseases
TCONS_l2_00000487	Adrenal	Adrenal related diseases
TCONS_l2_00000488	Lung	Lung related diseases
TCONS_l2_00002132	Lung	Lung related diseases
TCONS_00002455	Liver	Liver related diseases
TCONS_00001131	Adrenal	Adrenal related diseases
TCONS_00001668	Heart	Heart related diseases
TCONS_00001678	Breast	Breast related diseases
TCONS_l2_00001539	Testes	Testes related diseases
TCONS_00000641	Testes	Testes related diseases
TCONS_00000317	Brain	Brain related diseases
TCONS_00000646	Testes	Testes related diseases
TCONS_00001692	Testes	Testes related diseases
TCONS_00001175	Testes	Testes related diseases
TCONS_00001176	Testes	Testes related diseases
TCONS_00000651	Lung	Lung related diseases
TCONS_00001180	Testes	Testes related diseases
TCONS_00000325	Testes	Testes related diseases
TCONS_00001709	Testes	Testes related diseases
TCONS_00001710	Heart	Heart related diseases
TCONS_l2_00000673	Prostate	Prostate related diseases
TCONS_00001189	Testes	Testes related diseases
TCONS_00000673	Liver	Liver related diseases
TCONS_00000330	Kidney	Kidney related diseases
TCONS_00000332	Lung	Lung related diseases
TCONS_00001210	Whitebloodcell	Whitebloodcell related diseases
TCONS_00001737	Testes	Testes related diseases
TCONS_00000058	Heart	Heart related diseases
TCONS_00001211	Heart	Heart related diseases
TCONS_00002198	Heart	Heart related diseases
TCONS_l2_00000709	Heart	Heart related diseases
TCONS_l2_00002254	Heart	Heart related diseases
TCONS_00001215	Testes	Testes related diseases
TCONS_00001741	Testes	Testes related diseases
TCONS_00001756	Adrenal	Adrenal related diseases
TCONS_00001757	Testes	Testes related diseases
TCONS_00001225	Testes	Testes related diseases
TCONS_00000355	Testes	Testes related diseases
TCONS_00001761	Testes	Testes related diseases
TCONS_l2_00002271	Liver	Liver related diseases
TCONS_00001232	Breast	Breast related diseases
TCONS_00000710	HLF_r1	HLF_r1 related diseases
TCONS_00000364	Testes	Testes related diseases
TCONS_00000365	Testes	Testes related diseases
TCONS_00000112	Whitebloodcell	Whitebloodcell related diseases
TCONS_l2_00001700	Testes	Testes related diseases
TCONS_00001789	Testes	Testes related diseases
TCONS_00001253	Testes	Testes related diseases
TCONS_00001791	Brain	Brain related diseases
TCONS_l2_00002292	Testes	Testes related diseases
TCONS_l2_00000794	Testes	Testes related diseases
TCONS_l2_00002293	Testes	Testes related diseases
TCONS_00001801	Testes	Testes related diseases
TCONS_00000388	Testes	Testes related diseases
TCONS_00000393	Testes_R	Testes_R related diseases
TCONS_00001275	Thyroid	Thyroid related diseases
TCONS_00000731	Testes	Testes related diseases
TCONS_00001283	Kidney	Kidney related diseases
TCONS_00001284	Testes	Testes related diseases
TCONS_00001839	Testes	Testes related diseases
TCONS_00001844	Testes	Testes related diseases
TCONS_00000747	Testes	Testes related diseases
TCONS_00001313	Testes	Testes related diseases
TCONS_00001853	Testes	Testes related diseases
TCONS_00001854	Lung	Lung related diseases
TCONS_00001856	Testes	Testes related diseases
TCONS_00002621	Testes	Testes related diseases
TCONS_00000417	HLF_r1	HLF_r1 related diseases
TCONS_00000761	HLF_r1	HLF_r1 related diseases
TCONS_l2_00000903	Testes	Testes related diseases
TCONS_00000420	Testes_R	Testes_R related diseases
TCONS_00002622	Liver	Liver related diseases
TCONS_00002266	Testes_R	Testes_R related diseases
TCONS_00002264	Testes_R	Testes_R related diseases
TCONS_00002265	Testes_R	Testes_R related diseases
TCONS_00002263	Testes_R	Testes_R related diseases
TCONS_00000770	Kidney	Kidney related diseases
TCONS_00001347	Testes	Testes related diseases
TCONS_00001895	Testes	Testes related diseases
TCONS_00001896	Testes	Testes related diseases
TCONS_00001897	Testes	Testes related diseases
TCONS_00001900	Testes	Testes related diseases
TCONS_l2_00001916	Testes	Testes related diseases
TCONS_00001364	Testes	Testes related diseases
TCONS_00003194	Brain	Brain related diseases
TCONS_00003637	Heart	Heart related diseases
TCONS_00003362	Brain	Brain related diseases
TCONS_00004124	Testes	Testes related diseases
TCONS_00002817	Thyroid	Thyroid related diseases
TCONS_00004148	Adipose	Adipose related diseases
TCONS_00004156	Whitebloodcell	Whitebloodcell related diseases
TCONS_00003588	Testes	Testes related diseases
TCONS_l2_00014508	Testes	Testes related diseases
TCONS_l2_00015800	Testes	Testes related diseases
TCONS_l2_00014572	Testes	Testes related diseases
TCONS_00003691	Breast	Breast related diseases
TCONS_00003731	SkeletalMuscle	SkeletalMuscle related diseases
TCONS_00003350	Brain	Brain related diseases
TCONS_00003812	Testes	Testes related diseases
TCONS_00003360	Thyroid	Thyroid related diseases
TCONS_00004370	Testes	Testes related diseases
TCONS_00004434	Whitebloodcell	Whitebloodcell related diseases
TCONS_00002999	Prostate	Prostate related diseases
TCONS_00003029	Liver	Liver related diseases
TCONS_l2_00016030	Testes	Testes related diseases
TCONS_00003066	Testes	Testes related diseases
TCONS_00003975	Testes	Testes related diseases
TCONS_00004539	Testes	Testes related diseases
TCONS_00004033	Testes_R	Testes_R related diseases
TCONS_00004596	Heart	Heart related diseases
TCONS_00004041	Kidney	Kidney related diseases
TCONS_00004049	Heart	Heart related diseases
TCONS_00003514	Testes	Testes related diseases
TCONS_00003524	Heart	Heart related diseases
TCONS_00005376	Heart	Heart related diseases
TCONS_00005375	Heart	Heart related diseases
TCONS_00005379	Heart	Heart related diseases
TCONS_00005378	Heart	Heart related diseases
TCONS_00004652	Heart	Heart related diseases
TCONS_00003529	Adrenal	Adrenal related diseases
TCONS_00003144	Prostate	Prostate related diseases
TCONS_00003145	Testes	Testes related diseases
TCONS_00003146	Testes	Testes related diseases
TCONS_00003153	Brain	Brain related diseases
TCONS_00004099	Brain	Brain related diseases
TCONS_00003553	Testes	Testes related diseases
TCONS_00003169	Kidney	Kidney related diseases
TCONS_00004111	Testes	Testes related diseases
TCONS_00003173	Testes	Testes related diseases
TCONS_00004112	Testes	Testes related diseases
TCONS_00003176	Testes_R	Testes_R related diseases
TCONS_00003177	Testes_R	Testes_R related diseases
TCONS_00004113	Testes_R	Testes_R related diseases
TCONS_00004684	Adipose	Adipose related diseases
TCONS_00003193	Brain	Brain related diseases
TCONS_00002742	Brain	Brain related diseases
TCONS_00002660	Brain	Brain related diseases
TCONS_00002812	Liver	Liver related diseases
TCONS_00003558	Testes	Testes related diseases
TCONS_00002813	Kidney	Kidney related diseases
TCONS_00002824	Adrenal	Adrenal related diseases
TCONS_00003579	Adrenal	Adrenal related diseases
TCONS_00002825	Testes	Testes related diseases
TCONS_00004149	Testes	Testes related diseases
TCONS_00003211	Ovary	Ovary related diseases
TCONS_00004153	Brain	Brain related diseases
TCONS_00002831	Brain	Brain related diseases
TCONS_00002832	Brain	Brain related diseases
TCONS_00002834	Testes	Testes related diseases
TCONS_00003216	Breast	Breast related diseases
TCONS_00003587	Adrenal	Adrenal related diseases
TCONS_00004157	Lung	Lung related diseases
TCONS_00004162	Testes	Testes related diseases
TCONS_00004163	Kidney	Kidney related diseases
TCONS_00004713	Liver	Liver related diseases
TCONS_00004173	Liver	Liver related diseases
TCONS_00002747	Testes	Testes related diseases
TCONS_00004715	Testes_R	Testes_R related diseases
TCONS_00003234	Testes_R	Testes_R related diseases
TCONS_00003237	Lung	Lung related diseases
TCONS_00003618	Lung	Lung related diseases
TCONS_00003249	Testes_R	Testes_R related diseases
TCONS_00004747	Kidney	Kidney related diseases
TCONS_l2_00015761	Testes	Testes related diseases
TCONS_l2_00014507	Testes	Testes related diseases
TCONS_00004750	Testes_R	Testes_R related diseases
TCONS_00004755	Liver	Liver related diseases
TCONS_l2_00015312	Testes	Testes related diseases
TCONS_l2_00013593	Testes	Testes related diseases
TCONS_l2_00013594	Testes	Testes related diseases
TCONS_l2_00013595	Testes	Testes related diseases
TCONS_00003259	Testes_R	Testes_R related diseases
TCONS_00003260	Testes	Testes related diseases
TCONS_00004216	Adrenal	Adrenal related diseases
TCONS_00004220	Testes	Testes related diseases
TCONS_00003660	Colon	Colon related diseases
TCONS_00003661	Whitebloodcell	Whitebloodcell related diseases
TCONS_00003662	Whitebloodcell	Whitebloodcell related diseases
TCONS_00003271	Brain	Brain related diseases
TCONS_00003272	Brain	Brain related diseases
TCONS_00003283	Testes	Testes related diseases
TCONS_00003675	Testes	Testes related diseases
TCONS_l2_00014571	Testes	Testes related diseases
TCONS_00003680	Lung	Lung related diseases
TCONS_00003682	Breast	Breast related diseases
TCONS_00002752	Testes	Testes related diseases
TCONS_00004261	Adrenal	Adrenal related diseases
TCONS_00002895	Testes	Testes related diseases
TCONS_00003696	Testes	Testes related diseases
TCONS_00004264	Adrenal	Adrenal related diseases
TCONS_l2_00015809	Whitebloodcell	Whitebloodcell related diseases
TCONS_l2_00014586	Whitebloodcell	Whitebloodcell related diseases
TCONS_l2_00015810	Whitebloodcell	Whitebloodcell related diseases
TCONS_00004267	Heart	Heart related diseases
TCONS_l2_00014600	Ovary	Ovary related diseases
TCONS_00002666	HLF_r1	HLF_r1 related diseases
TCONS_00004284	Whitebloodcell	Whitebloodcell related diseases
TCONS_00003711	Adrenal	Adrenal related diseases
TCONS_00002915	Testes	Testes related diseases
TCONS_00002704	Testes	Testes related diseases
TCONS_00003718	Testes	Testes related diseases
TCONS_00003309	Kidney	Kidney related diseases
TCONS_00002916	Testes	Testes related diseases
TCONS_00002917	Testes	Testes related diseases
TCONS_00003310	Ovary	Ovary related diseases
TCONS_00003724	Liver	Liver related diseases
TCONS_00003725	Testes	Testes related diseases
TCONS_00003728	Testes	Testes related diseases
TCONS_00004299	Testes_R	Testes_R related diseases
TCONS_00004303	Prostate	Prostate related diseases
TCONS_00002933	Testes	Testes related diseases
TCONS_l2_00015840	Whitebloodcell	Whitebloodcell related diseases
TCONS_l2_00014643	Whitebloodcell	Whitebloodcell related diseases
TCONS_00004307	Testes	Testes related diseases
TCONS_00004314	LymphNode	LymphNode related diseases
TCONS_00004316	Testes	Testes related diseases
TCONS_00004317	Testes	Testes related diseases
TCONS_00004318	Testes	Testes related diseases
TCONS_l2_00015848	Kidney	Kidney related diseases
TCONS_l2_00015849	Kidney	Kidney related diseases
TCONS_l2_00015850	Kidney	Kidney related diseases
TCONS_00004319	Testes	Testes related diseases
TCONS_00003748	Testes	Testes related diseases
TCONS_l2_00013739	SkeletalMuscle	SkeletalMuscle related diseases
TCONS_00004320	Testes	Testes related diseases
TCONS_00003750	Testes	Testes related diseases
TCONS_00003751	Brain	Brain related diseases
TCONS_00004324	Thyroid	Thyroid related diseases
TCONS_00005194	Liver	Liver related diseases
TCONS_l2_00014691	Testes	Testes related diseases
TCONS_00003765	HLF_r1	HLF_r1 related diseases
TCONS_l2_00014694	Testes_R	Testes_R related diseases
TCONS_00004332	Thyroid	Thyroid related diseases
TCONS_00003791	Testes_R	Testes_R related diseases
TCONS_00002715	Whitebloodcell	Whitebloodcell related diseases
TCONS_00002951	Whitebloodcell	Whitebloodcell related diseases
TCONS_00003349	Liver	Liver related diseases
TCONS_00002960	Testes	Testes related diseases
TCONS_00004363	Testes	Testes related diseases
TCONS_00004368	Testes	Testes related diseases
TCONS_00003358	Testes	Testes related diseases
TCONS_00003359	Whitebloodcell	Whitebloodcell related diseases
TCONS_00003811	Testes	Testes related diseases
TCONS_00002968	Testes	Testes related diseases
TCONS_00003361	Thyroid	Thyroid related diseases
TCONS_00003364	Kidney	Kidney related diseases
TCONS_00004371	Kidney	Kidney related diseases
TCONS_00003822	Liver	Liver related diseases
TCONS_00004419	Testes	Testes related diseases
TCONS_00003829	Testes	Testes related diseases
TCONS_00003837	Testes	Testes related diseases
TCONS_00003838	Testes_R	Testes_R related diseases
TCONS_00004430	Testes	Testes related diseases
TCONS_00002991	Kidney	Kidney related diseases
TCONS_00004431	Testes	Testes related diseases
TCONS_00005244	Testes	Testes related diseases
TCONS_00005245	Testes	Testes related diseases
TCONS_00003846	Whitebloodcell	Whitebloodcell related diseases
TCONS_00003847	Testes	Testes related diseases
TCONS_00003848	Testes	Testes related diseases
TCONS_00003850	Testes	Testes related diseases
TCONS_00004880	Lung	Lung related diseases
TCONS_00003851	Lung	Lung related diseases
TCONS_00004440	SkeletalMuscle	SkeletalMuscle related diseases
TCONS_00003866	Brain	Brain related diseases
TCONS_00003400	Kidney	Kidney related diseases
TCONS_00002721	Prostate	Prostate related diseases
TCONS_00003876	Testes_R	Testes_R related diseases
TCONS_00004889	Testes_R	Testes_R related diseases
TCONS_00004897	Lung	Lung related diseases
TCONS_00003007	Ovary	Ovary related diseases
TCONS_00004459	Testes	Testes related diseases
TCONS_00003027	Testes_R	Testes_R related diseases
TCONS_00003901	Liver	Liver related diseases
TCONS_00003906	Testes	Testes related diseases
TCONS_00003907	Prostate	Prostate related diseases
TCONS_00005256	Kidney	Kidney related diseases
TCONS_00004474	Kidney	Kidney related diseases
TCONS_l2_00014955	Testes	Testes related diseases
TCONS_00003908	Testes	Testes related diseases
TCONS_00003909	Testes	Testes related diseases
TCONS_00004479	Testes	Testes related diseases
TCONS_00003040	Thyroid	Thyroid related diseases
TCONS_00003923	Testes	Testes related diseases
TCONS_00003924	Testes	Testes related diseases
TCONS_00004485	Foreskin	Foreskin related diseases
TCONS_00005263	Foreskin	Foreskin related diseases
TCONS_00003928	Testes	Testes related diseases
TCONS_00003929	Testes	Testes related diseases
TCONS_00004943	Testes	Testes related diseases
TCONS_00003930	Testes	Testes related diseases
TCONS_00003931	Testes	Testes related diseases
TCONS_00003937	Prostate	Prostate related diseases
TCONS_00003049	Testes_R	Testes_R related diseases
TCONS_00003940	Testes_R	Testes_R related diseases
TCONS_00004500	Testes	Testes related diseases
TCONS_l2_00014990	Testes	Testes related diseases
TCONS_l2_00016019	Testes	Testes related diseases
TCONS_00004501	Testes	Testes related diseases
TCONS_00004502	Heart	Heart related diseases
TCONS_00003450	Prostate	Prostate related diseases
TCONS_00004506	Prostate	Prostate related diseases
TCONS_l2_00016031	Testes	Testes related diseases
TCONS_l2_00016032	Testes	Testes related diseases
TCONS_00003950	Testes	Testes related diseases
TCONS_00003951	Testes	Testes related diseases
TCONS_00003059	Lung	Lung related diseases
TCONS_00003953	Lung	Lung related diseases
TCONS_00003954	Testes	Testes related diseases
TCONS_00003955	Prostate	Prostate related diseases
TCONS_00003461	Testes	Testes related diseases
TCONS_00003064	Testes	Testes related diseases
TCONS_00003462	Testes	Testes related diseases
TCONS_00003073	Adrenal	Adrenal related diseases
TCONS_00004541	Testes	Testes related diseases
TCONS_00004973	Testes	Testes related diseases
TCONS_00004557	Testes	Testes related diseases
TCONS_00003086	Colon	Colon related diseases
TCONS_00004570	Thyroid	Thyroid related diseases
TCONS_00004014	Testes	Testes related diseases
TCONS_00004016	Testes_R	Testes_R related diseases
TCONS_00004025	Testes	Testes related diseases
TCONS_l2_00015120	Prostate	Prostate related diseases
TCONS_00004031	Lung	Lung related diseases
TCONS_00004032	Heart	Heart related diseases
TCONS_00004034	Thyroid	Thyroid related diseases
TCONS_00003112	Thyroid	Thyroid related diseases
TCONS_00004036	Testes	Testes related diseases
TCONS_00003113	Testes	Testes related diseases
TCONS_00004037	Testes	Testes related diseases
TCONS_00004038	Testes	Testes related diseases
TCONS_00004039	Testes	Testes related diseases
TCONS_00004042	Kidney	Kidney related diseases
TCONS_00004043	Testes	Testes related diseases
TCONS_l2_00014275	Testes	Testes related diseases
TCONS_00004599	Thyroid	Thyroid related diseases
TCONS_00003121	Brain	Brain related diseases
TCONS_00003122	Brain	Brain related diseases
TCONS_00002732	Brain	Brain related diseases
TCONS_00003123	Brain	Brain related diseases
TCONS_00003124	Brain	Brain related diseases
TCONS_00003513	HLF_r1	HLF_r1 related diseases
TCONS_l2_00015623	Testes	Testes related diseases
TCONS_00004057	HLF_r1	HLF_r1 related diseases
TCONS_00003515	Testes	Testes related diseases
TCONS_00002782	Testes	Testes related diseases
TCONS_00004058	Testes	Testes related diseases
TCONS_00003130	LymphNode	LymphNode related diseases
TCONS_00003131	LymphNode	LymphNode related diseases
TCONS_00003517	SkeletalMuscle	SkeletalMuscle related diseases
TCONS_00004619	HLF_r1	HLF_r1 related diseases
TCONS_00003518	LymphNode	LymphNode related diseases
TCONS_00004623	Testes	Testes related diseases
TCONS_00003520	Foreskin	Foreskin related diseases
TCONS_00004627	Brain	Brain related diseases
TCONS_l2_00014321	Lung	Lung related diseases
TCONS_l2_00014322	Ovary	Ovary related diseases
TCONS_00005377	Heart	Heart related diseases
TCONS_00005049	Heart	Heart related diseases
TCONS_00005496	Kidney	Kidney related diseases
TCONS_00006923	Lung	Lung related diseases
TCONS_00006138	Lung	Lung related diseases
TCONS_00005724	Testes	Testes related diseases
TCONS_00005725	Testes	Testes related diseases
TCONS_00005726	Testes	Testes related diseases
TCONS_00005490	Thyroid	Thyroid related diseases
TCONS_00005491	Thyroid	Thyroid related diseases
TCONS_00005950	Testes	Testes related diseases
TCONS_00006507	Adipose	Adipose related diseases
TCONS_00006518	Lung	Lung related diseases
TCONS_00006128	Testes	Testes related diseases
TCONS_00006132	Placenta_R	Placenta_R related diseases
TCONS_00006131	Placenta_R	Placenta_R related diseases
TCONS_00005423	Testes_R	Testes_R related diseases
TCONS_00006568	HLF_r1	HLF_r1 related diseases
TCONS_00005818	Testes_R	Testes_R related diseases
TCONS_l2_00020222	Thyroid	Thyroid related diseases
TCONS_00005851	Adipose	Adipose related diseases
TCONS_00005852	Adipose	Adipose related diseases
TCONS_00006710	HLF_r1	HLF_r1 related diseases
TCONS_00007043	Testes_R	Testes_R related diseases
TCONS_l2_00019020	Testes	Testes related diseases
TCONS_l2_00019992	Testes	Testes related diseases
TCONS_l2_00019021	Testes	Testes related diseases
TCONS_00005488	Testes	Testes related diseases
TCONS_00006398	Testes	Testes related diseases
TCONS_00007109	Testes_R	Testes_R related diseases
TCONS_00005945	Testes	Testes related diseases
TCONS_00006442	Breast	Breast related diseases
TCONS_l2_00019174	Testes	Testes related diseases
TCONS_00005948	Testes	Testes related diseases
TCONS_00006452	Testes	Testes related diseases
TCONS_00005497	Kidney	Kidney related diseases
TCONS_00006454	Testes	Testes related diseases
TCONS_00006456	Testes_R	Testes_R related diseases
TCONS_00005987	Testes_R	Testes_R related diseases
TCONS_00005996	Adrenal	Adrenal related diseases
TCONS_00006001	Testes	Testes related diseases
TCONS_00006007	Testes	Testes related diseases
TCONS_00006506	Kidney	Kidney related diseases
TCONS_00006511	Liver	Liver related diseases
TCONS_00006514	Testes	Testes related diseases
TCONS_00005519	Testes	Testes related diseases
TCONS_00005520	Testes	Testes related diseases
TCONS_00005777	Testes	Testes related diseases
TCONS_00005778	Prostate	Prostate related diseases
TCONS_00006032	Prostate	Prostate related diseases
TCONS_l2_00018583	Heart	Heart related diseases
TCONS_00006040	Brain	Brain related diseases
TCONS_00006041	Heart	Heart related diseases
TCONS_00006524	Testes_R	Testes_R related diseases
TCONS_00006525	Testes	Testes related diseases
TCONS_00006526	Testes	Testes related diseases
TCONS_00005535	Testes	Testes related diseases
TCONS_00005536	Testes	Testes related diseases
TCONS_00006085	Testes	Testes related diseases
TCONS_00005781	Testes	Testes related diseases
TCONS_00006098	Testes	Testes related diseases
TCONS_00006545	Testes	Testes related diseases
TCONS_00005546	Ovary	Ovary related diseases
TCONS_00005547	Ovary	Ovary related diseases
TCONS_00005548	Ovary	Ovary related diseases
TCONS_00005792	Lung	Lung related diseases
TCONS_00005793	Lung	Lung related diseases
TCONS_00005794	Testes	Testes related diseases
TCONS_00006111	Testes	Testes related diseases
TCONS_00006549	Testes	Testes related diseases
TCONS_00006129	Thyroid	Thyroid related diseases
TCONS_00006130	Testes	Testes related diseases
TCONS_l2_00018703	Testes	Testes related diseases
TCONS_00006139	Testes_R	Testes_R related diseases
TCONS_00006570	Testes	Testes related diseases
TCONS_00006579	Brain	Brain related diseases
TCONS_00005805	Testes	Testes related diseases
TCONS_00006604	Colon	Colon related diseases
TCONS_00007229	Colon	Colon related diseases
TCONS_00006616	HLF_r1	HLF_r1 related diseases
TCONS_00005464	Prostate	Prostate related diseases
TCONS_00006166	Testes	Testes related diseases
TCONS_00006167	Testes	Testes related diseases
TCONS_00007242	Testes	Testes related diseases
TCONS_00006170	Breast	Breast related diseases
TCONS_00006621	Testes	Testes related diseases
TCONS_00006631	Testes	Testes related diseases
TCONS_00006206	Testes	Testes related diseases
TCONS_00005583	Testes_R	Testes_R related diseases
TCONS_00006207	Testes_R	Testes_R related diseases
TCONS_00006965	Testes	Testes related diseases
TCONS_00006224	Whitebloodcell	Whitebloodcell related diseases
TCONS_00006236	Testes	Testes related diseases
TCONS_00005829	Testes	Testes related diseases
TCONS_00006666	Whitebloodcell	Whitebloodcell related diseases
TCONS_00006675	Testes	Testes related diseases
TCONS_00006248	Testes_R	Testes_R related diseases
TCONS_00006992	Testes_R	Testes_R related diseases
TCONS_00006254	Brain	Brain related diseases
TCONS_00006256	Testes	Testes related diseases
TCONS_00005613	Testes	Testes related diseases
TCONS_00007002	Testes	Testes related diseases
TCONS_00006262	Liver	Liver related diseases
TCONS_00007003	Liver	Liver related diseases
TCONS_l2_00020216	Breast	Breast related diseases
TCONS_l2_00020217	Breast	Breast related diseases
TCONS_00005848	Placenta_R	Placenta_R related diseases
TCONS_00006275	Prostate	Prostate related diseases
TCONS_00005849	Whitebloodcell	Whitebloodcell related diseases
TCONS_00006280	Brain	Brain related diseases
TCONS_00005850	Whitebloodcell	Whitebloodcell related diseases
TCONS_00007011	Breast	Breast related diseases
TCONS_00006285	Kidney	Kidney related diseases
TCONS_00005861	Testes	Testes related diseases
TCONS_00005862	Testes	Testes related diseases
TCONS_00005865	Testes	Testes related diseases
TCONS_00005877	Brain	Brain related diseases
TCONS_00006704	Testes	Testes related diseases
TCONS_00006705	Testes	Testes related diseases
TCONS_00005645	Thyroid	Thyroid related diseases
TCONS_00005654	Breast	Breast related diseases
TCONS_00005655	Testes	Testes related diseases
TCONS_00006707	Testes	Testes related diseases
TCONS_00007041	Testes	Testes related diseases
TCONS_00005881	Testes	Testes related diseases
TCONS_00005898	Brain	Brain related diseases
TCONS_00005899	Brain	Brain related diseases
TCONS_00005900	Brain	Brain related diseases
TCONS_00006718	Testes	Testes related diseases
TCONS_00005674	Testes	Testes related diseases
TCONS_00005675	Ovary	Ovary related diseases
TCONS_l2_00020002	Lung	Lung related diseases
TCONS_l2_00019027	Lung	Lung related diseases
TCONS_00005902	Testes	Testes related diseases
TCONS_00007318	Testes	Testes related diseases
TCONS_l2_00020288	Testes	Testes related diseases
TCONS_l2_00019640	Testes	Testes related diseases
TCONS_00005678	Testes	Testes related diseases
TCONS_00006346	Kidney	Kidney related diseases
TCONS_00006736	Testes	Testes related diseases
TCONS_00006739	Kidney	Kidney related diseases
TCONS_l2_00020301	Kidney	Kidney related diseases
TCONS_l2_00019669	Kidney	Kidney related diseases
TCONS_00005699	Prostate	Prostate related diseases
TCONS_00006373	Kidney	Kidney related diseases
TCONS_00006387	Thyroid	Thyroid related diseases
TCONS_00007086	Whitebloodcell	Whitebloodcell related diseases
TCONS_00005721	Lung	Lung related diseases
TCONS_00008437	Heart	Heart related diseases
TCONS_00007495	Breast	Breast related diseases
TCONS_00008457	Breast	Breast related diseases
TCONS_00008377	Testes	Testes related diseases
TCONS_00007998	Testes	Testes related diseases
TCONS_l2_00021553	Ovary	Ovary related diseases
TCONS_l2_00021855	Liver	Liver related diseases
TCONS_l2_00021856	Liver	Liver related diseases
TCONS_l2_00021103	Testes	Testes related diseases
TCONS_l2_00021858	Testes	Testes related diseases
TCONS_l2_00021859	Testes	Testes related diseases
TCONS_l2_00021860	Testes	Testes related diseases
TCONS_00007753	Kidney	Kidney related diseases
TCONS_00007754	Kidney	Kidney related diseases
TCONS_l2_00021607	Placenta_R	Placenta_R related diseases
TCONS_00007361	Testes_R	Testes_R related diseases
TCONS_00007784	Adrenal	Adrenal related diseases
TCONS_00008530	Brain	Brain related diseases
TCONS_00007429	HLF_r1	HLF_r1 related diseases
TCONS_00007796	HLF_r1	HLF_r1 related diseases
TCONS_00007398	Testes	Testes related diseases
TCONS_00008169	Lung	Lung related diseases
TCONS_l2_00021937	Whitebloodcell	Whitebloodcell related diseases
TCONS_00008202	Testes	Testes related diseases
TCONS_l2_00021950	Testes	Testes related diseases
TCONS_l2_00021951	Testes	Testes related diseases
TCONS_00007433	Testes	Testes related diseases
TCONS_00007833	Brain	Brain related diseases
TCONS_00007836	LymphNode	LymphNode related diseases
TCONS_00008258	Testes	Testes related diseases
TCONS_00007642	Testes	Testes related diseases
TCONS_l2_00021387	Breast	Breast related diseases
TCONS_00007906	Testes	Testes related diseases
TCONS_00008353	HLF_r1	HLF_r1 related diseases
TCONS_00007374	Brain	Brain related diseases
TCONS_00008672	Brain	Brain related diseases
TCONS_00008372	Testes	Testes related diseases
TCONS_l2_00021809	Kidney	Kidney related diseases
TCONS_l2_00021810	Kidney	Kidney related diseases
TCONS_l2_00021811	Kidney	Kidney related diseases
TCONS_00009003	Testes_R	Testes_R related diseases
TCONS_00007379	Kidney	Kidney related diseases
TCONS_00007378	Kidney	Kidney related diseases
TCONS_00007957	Kidney	Kidney related diseases
TCONS_00007462	Kidney	Kidney related diseases
TCONS_00007958	Kidney	Kidney related diseases
TCONS_00007959	Testes	Testes related diseases
TCONS_00007369	Prostate	Prostate related diseases
TCONS_l2_00021036	Brain	Brain related diseases
TCONS_00007972	Prostate	Prostate related diseases
TCONS_00008751	Placenta_R	Placenta_R related diseases
TCONS_00008431	Testes	Testes related diseases
TCONS_l2_00020401	Testes	Testes related diseases
TCONS_00007980	Thyroid	Thyroid related diseases
TCONS_00007985	Testes	Testes related diseases
TCONS_00008438	Heart	Heart related diseases
TCONS_00008763	Testes	Testes related diseases
TCONS_00009029	Heart	Heart related diseases
TCONS_00007482	LymphNode	LymphNode related diseases
TCONS_00007483	LymphNode	LymphNode related diseases
TCONS_00008002	Brain	Brain related diseases
TCONS_00008447	Thyroid	Thyroid related diseases
TCONS_00007728	Kidney	Kidney related diseases
TCONS_00008448	Kidney	Kidney related diseases
TCONS_00008011	Testes_R	Testes_R related diseases
TCONS_00008450	Testes	Testes related diseases
TCONS_00008451	Lung	Lung related diseases
TCONS_00007494	Lung	Lung related diseases
TCONS_00007736	LymphNode	LymphNode related diseases
TCONS_00008021	Testes	Testes related diseases
TCONS_00007737	Brain	Brain related diseases
TCONS_l2_00020464	Ovary	Ovary related diseases
TCONS_00008029	Testes	Testes related diseases
TCONS_00007500	Testes	Testes related diseases
TCONS_00008033	Heart	Heart related diseases
TCONS_00008036	Testes	Testes related diseases
TCONS_l2_00021099	Liver	Liver related diseases
TCONS_l2_00021100	Liver	Liver related diseases
TCONS_l2_00021101	Liver	Liver related diseases
TCONS_00008462	Testes	Testes related diseases
TCONS_00008037	Testes	Testes related diseases
TCONS_00008464	Liver	Liver related diseases
TCONS_00008048	Testes	Testes related diseases
TCONS_00007518	Adrenal	Adrenal related diseases
TCONS_00008471	Brain	Brain related diseases
TCONS_00007755	Kidney	Kidney related diseases
TCONS_00008064	Testes	Testes related diseases
TCONS_l2_00021132	Testes	Testes related diseases
TCONS_l2_00021137	Adipose	Adipose related diseases
TCONS_00008792	Brain	Brain related diseases
TCONS_00007530	Brain	Brain related diseases
TCONS_00007761	Liver	Liver related diseases
TCONS_00007762	Liver	Liver related diseases
TCONS_00008088	Testes	Testes related diseases
TCONS_l2_00021603	Testes	Testes related diseases
TCONS_l2_00020545	Testes	Testes related diseases
TCONS_00007542	Testes	Testes related diseases
TCONS_00007543	Testes	Testes related diseases
TCONS_00008797	Testes	Testes related diseases
TCONS_00008092	Heart	Heart related diseases
TCONS_00008495	Testes	Testes related diseases
TCONS_l2_00020549	Heart	Heart related diseases
TCONS_00008095	Testes_R	Testes_R related diseases
TCONS_00008096	Testes	Testes related diseases
TCONS_00007547	Testes	Testes related diseases
TCONS_00008500	Kidney	Kidney related diseases
TCONS_00009069	Kidney	Kidney related diseases
TCONS_00008501	Kidney	Kidney related diseases
TCONS_00009070	Kidney	Kidney related diseases
TCONS_00007425	Testes	Testes related diseases
TCONS_00008102	Testes	Testes related diseases
TCONS_00008110	Testes_R	Testes_R related diseases
TCONS_00007783	SkeletalMuscle	SkeletalMuscle related diseases
TCONS_00008129	Testes	Testes related diseases
TCONS_00008138	Testes	Testes related diseases
TCONS_00007373	Testes	Testes related diseases
TCONS_00008515	Testes	Testes related diseases
TCONS_00008514	Testes	Testes related diseases
TCONS_00007791	Testes	Testes related diseases
TCONS_00008153	Testes	Testes related diseases
TCONS_00008528	Testes	Testes related diseases
TCONS_00008164	Testes	Testes related diseases
TCONS_00008529	Testes	Testes related diseases
TCONS_00009085	Testes	Testes related diseases
TCONS_00008532	Testes_R	Testes_R related diseases
TCONS_l2_00020663	Brain	Brain related diseases
TCONS_00007581	Testes	Testes related diseases
TCONS_00008182	Testes	Testes related diseases
TCONS_00007585	Kidney	Kidney related diseases
TCONS_00008189	Testes	Testes related diseases
TCONS_00008546	Testes	Testes related diseases
TCONS_00008548	Testes	Testes related diseases
TCONS_00007401	HLF_r1	HLF_r1 related diseases
TCONS_00008199	Testes_R	Testes_R related diseases
TCONS_00008871	Testes_R	Testes_R related diseases
TCONS_00007817	Testes_R	Testes_R related diseases
TCONS_00009109	Testes_R	Testes_R related diseases
TCONS_00007602	Testes	Testes related diseases
TCONS_00008206	Testes	Testes related diseases
TCONS_00008562	Whitebloodcell	Whitebloodcell related diseases
TCONS_00008565	Thyroid	Thyroid related diseases
TCONS_00008216	Adipose	Adipose related diseases
TCONS_00008566	Liver	Liver related diseases
TCONS_00008575	Brain	Brain related diseases
TCONS_00007825	Heart	Heart related diseases
TCONS_00007826	Heart	Heart related diseases
TCONS_00008580	Breast	Breast related diseases
TCONS_00008259	Thyroid	Thyroid related diseases
TCONS_l2_00021309	Testes	Testes related diseases
TCONS_l2_00022002	Testes	Testes related diseases
TCONS_00007640	Testes	Testes related diseases
TCONS_00007641	Testes	Testes related diseases
TCONS_00007643	Testes	Testes related diseases
TCONS_00008271	Brain	Brain related diseases
TCONS_00008899	Brain	Brain related diseases
TCONS_00007859	Thyroid	Thyroid related diseases
TCONS_00008273	Testes_R	Testes_R related diseases
TCONS_00008603	Kidney	Kidney related diseases
TCONS_00009133	Kidney	Kidney related diseases
TCONS_00008606	Testes	Testes related diseases
TCONS_00007869	Testes_R	Testes_R related diseases
TCONS_00007870	Testes_R	Testes_R related diseases
TCONS_00007871	LymphNode	LymphNode related diseases
TCONS_l2_00021752	Kidney	Kidney related diseases
TCONS_00008289	Heart	Heart related diseases
TCONS_00007659	Heart	Heart related diseases
TCONS_00007879	Testes	Testes related diseases
TCONS_00007884	Breast	Breast related diseases
TCONS_l2_00022036	Testes	Testes related diseases
TCONS_l2_00021363	Testes	Testes related diseases
TCONS_00008304	Testes	Testes related diseases
TCONS_00008635	Brain	Brain related diseases
TCONS_l2_00020853	Testes	Testes related diseases
TCONS_00008636	Testes	Testes related diseases
TCONS_00008637	Testes	Testes related diseases
TCONS_00007892	Testes	Testes related diseases
TCONS_l2_00020871	Testes	Testes related diseases
TCONS_00007895	Testes	Testes related diseases
TCONS_00008322	Testes	Testes related diseases
TCONS_00007898	Testes	Testes related diseases
TCONS_00008644	Testes	Testes related diseases
TCONS_00008645	Testes	Testes related diseases
TCONS_00008935	Colon	Colon related diseases
TCONS_00008651	Heart	Heart related diseases
TCONS_00009167	Heart	Heart related diseases
TCONS_00007899	Colon	Colon related diseases
TCONS_00007900	Colon	Colon related diseases
TCONS_00008336	Heart	Heart related diseases
TCONS_00008663	Testes	Testes related diseases
TCONS_00008341	Testes	Testes related diseases
TCONS_00008664	Lung	Lung related diseases
TCONS_00007908	Testes	Testes related diseases
TCONS_00007687	Testes	Testes related diseases
TCONS_00008349	Testes	Testes related diseases
TCONS_00008352	Testes_R	Testes_R related diseases
TCONS_00007915	HLF_r1	HLF_r1 related diseases
TCONS_00007914	HLF_r1	HLF_r1 related diseases
TCONS_00008948	Testes	Testes related diseases
TCONS_00008360	Liver	Liver related diseases
TCONS_00007689	Kidney	Kidney related diseases
TCONS_00008366	Heart	Heart related diseases
TCONS_00008698	Thyroid	Thyroid related diseases
TCONS_00008368	Testes	Testes related diseases
TCONS_00007931	Testes	Testes related diseases
TCONS_00008379	Testes	Testes related diseases
TCONS_00008980	Testes	Testes related diseases
TCONS_00008726	Kidney	Kidney related diseases
TCONS_00009729	Brain	Brain related diseases
TCONS_l2_00023040	Testes	Testes related diseases
TCONS_l2_00023692	HLF_r1	HLF_r1 related diseases
TCONS_l2_00023693	HLF_r1	HLF_r1 related diseases
TCONS_00009923	Testes	Testes related diseases
TCONS_00010318	Breast	Breast related diseases
TCONS_00009979	Brain	Brain related diseases
TCONS_00009983	Testes	Testes related diseases
TCONS_l2_00023776	Testes_R	Testes_R related diseases
TCONS_00009702	Brain	Brain related diseases
TCONS_l2_00022964	Ovary	Ovary related diseases
TCONS_00009467	Ovary	Ovary related diseases
TCONS_l2_00023491	Testes	Testes related diseases
TCONS_00009501	Testes	Testes related diseases
TCONS_00009513	SkeletalMuscle	SkeletalMuscle related diseases
TCONS_00010140	Kidney	Kidney related diseases
TCONS_00010154	Testes	Testes related diseases
TCONS_00010226	Testes	Testes related diseases
TCONS_00009322	Kidney	Kidney related diseases
TCONS_l2_00023626	Testes	Testes related diseases
TCONS_l2_00022718	Testes	Testes related diseases
TCONS_00010241	Testes	Testes related diseases
TCONS_00009581	Testes	Testes related diseases
TCONS_00009328	Breast	Breast related diseases
TCONS_00009837	Testes	Testes related diseases
TCONS_00010248	Kidney	Kidney related diseases
TCONS_00009849	Adipose	Adipose related diseases
TCONS_00009331	Testes	Testes related diseases
TCONS_00009851	Testes	Testes related diseases
TCONS_00009584	Testes	Testes related diseases
TCONS_00009332	Testes	Testes related diseases
TCONS_l2_00023652	Testes	Testes related diseases
TCONS_l2_00022763	Testes	Testes related diseases
TCONS_00009591	Testes	Testes related diseases
TCONS_00009592	Testes	Testes related diseases
TCONS_00010257	Testes	Testes related diseases
TCONS_00010258	Kidney	Kidney related diseases
TCONS_00009341	Testes	Testes related diseases
TCONS_00009342	Testes	Testes related diseases
TCONS_00009345	Testes	Testes related diseases
TCONS_00009601	Testes	Testes related diseases
TCONS_00009605	Testes	Testes related diseases
TCONS_00009606	Testes	Testes related diseases
TCONS_00009876	HLF_r1	HLF_r1 related diseases
TCONS_00009877	Heart	Heart related diseases
TCONS_00009882	Testes_R	Testes_R related diseases
TCONS_00010279	Testes	Testes related diseases
TCONS_00009222	Testes	Testes related diseases
TCONS_00009362	Whitebloodcell	Whitebloodcell related diseases
TCONS_00009361	Whitebloodcell	Whitebloodcell related diseases
TCONS_00009889	Whitebloodcell	Whitebloodcell related diseases
TCONS_l2_00023683	Testes	Testes related diseases
TCONS_l2_00023684	Testes	Testes related diseases
TCONS_l2_00022810	Testes	Testes related diseases
TCONS_00009616	Testes	Testes related diseases
TCONS_00009369	Testes	Testes related diseases
TCONS_00010281	Testes	Testes related diseases
TCONS_l2_00023691	HLF_r1	HLF_r1 related diseases
TCONS_00010284	Testes	Testes related diseases
TCONS_00009912	Testes	Testes related diseases
TCONS_00010293	Testes	Testes related diseases
TCONS_00010294	Whitebloodcell	Whitebloodcell related diseases
TCONS_00009212	Testes	Testes related diseases
TCONS_00009375	Testes	Testes related diseases
TCONS_00009631	Testes	Testes related diseases
TCONS_00009634	Testes	Testes related diseases
TCONS_00010299	Testes	Testes related diseases
TCONS_00010302	Ovary	Ovary related diseases
TCONS_00009641	Testes	Testes related diseases
TCONS_00009382	SkeletalMuscle	SkeletalMuscle related diseases
TCONS_00009383	Testes	Testes related diseases
TCONS_00010319	Whitebloodcell	Whitebloodcell related diseases
TCONS_l2_00023383	HLF_r1	HLF_r1 related diseases
TCONS_00009394	Colon	Colon related diseases
TCONS_00009956	Testes	Testes related diseases
TCONS_00009957	Testes	Testes related diseases
TCONS_l2_00023390	Prostate	Prostate related diseases
TCONS_l2_00022305	Prostate	Prostate related diseases
TCONS_00009399	Thyroid	Thyroid related diseases
TCONS_00009958	Testes	Testes related diseases
TCONS_00010330	Prostate	Prostate related diseases
TCONS_00010331	Testes	Testes related diseases
TCONS_l2_00023392	Lung	Lung related diseases
TCONS_l2_00023393	Lung	Lung related diseases
TCONS_00009667	Kidney	Kidney related diseases
TCONS_l2_00022912	Thyroid	Thyroid related diseases
TCONS_00010347	Testes	Testes related diseases
TCONS_00009672	Breast	Breast related diseases
TCONS_00010701	Brain	Brain related diseases
TCONS_00009980	Brain	Brain related diseases
TCONS_00010357	Testes	Testes related diseases
TCONS_00009981	Testes	Testes related diseases
TCONS_00009677	LymphNode	LymphNode related diseases
TCONS_00009987	Testes	Testes related diseases
TCONS_l2_00023408	Adrenal	Adrenal related diseases
TCONS_00010369	Testes	Testes related diseases
TCONS_00009422	Testes	Testes related diseases
TCONS_00009699	Lung	Lung related diseases
TCONS_00010377	Testes_R	Testes_R related diseases
TCONS_00010378	Testes_R	Testes_R related diseases
TCONS_00010379	Testes	Testes related diseases
TCONS_00009708	Thyroid	Thyroid related diseases
TCONS_00010003	Whitebloodcell	Whitebloodcell related diseases
TCONS_00010005	SkeletalMuscle	SkeletalMuscle related diseases
TCONS_00010008	Testes	Testes related diseases
TCONS_00010392	Brain	Brain related diseases
TCONS_00009718	Brain	Brain related diseases
TCONS_00009719	Brain	Brain related diseases
TCONS_00009720	Brain	Brain related diseases
TCONS_00009721	Whitebloodcell	Whitebloodcell related diseases
TCONS_00010039	Heart	Heart related diseases
TCONS_00009461	Heart	Heart related diseases
TCONS_00010040	Breast	Breast related diseases
TCONS_00009733	Testes_R	Testes_R related diseases
TCONS_00010427	Testes	Testes related diseases
TCONS_00009472	Testes	Testes related diseases
TCONS_00010757	Testes_R	Testes_R related diseases
TCONS_00010438	Testes	Testes related diseases
TCONS_00009482	Brain	Brain related diseases
TCONS_00009483	Brain	Brain related diseases
TCONS_00009484	Brain	Brain related diseases
TCONS_00009753	Testes	Testes related diseases
TCONS_00010061	Liver	Liver related diseases
TCONS_l2_00023511	LymphNode	LymphNode related diseases
TCONS_00009757	Lung	Lung related diseases
TCONS_00009761	Breast	Breast related diseases
TCONS_00009498	Brain	Brain related diseases
TCONS_00010076	Breast	Breast related diseases
TCONS_00010456	Brain	Brain related diseases
TCONS_00009771	Brain	Brain related diseases
TCONS_00010462	Testes	Testes related diseases
TCONS_00011029	Testes	Testes related diseases
TCONS_00009785	Testes	Testes related diseases
TCONS_00010092	Testes	Testes related diseases
TCONS_00009311	Testes	Testes related diseases
TCONS_00009791	Testes	Testes related diseases
TCONS_00009312	Testes	Testes related diseases
TCONS_00010493	Testes	Testes related diseases
TCONS_00010494	Testes	Testes related diseases
TCONS_00010103	Testes	Testes related diseases
TCONS_00010105	Testes	Testes related diseases
TCONS_00010106	Testes	Testes related diseases
TCONS_00010119	Testes_R	Testes_R related diseases
TCONS_00009796	Prostate	Prostate related diseases
TCONS_00010520	Colon	Colon related diseases
TCONS_00009533	Heart	Heart related diseases
TCONS_00009534	Heart	Heart related diseases
TCONS_00010148	Testes	Testes related diseases
TCONS_00010536	Breast	Breast related diseases
TCONS_00010150	Testes	Testes related diseases
TCONS_00009230	Testes	Testes related diseases
TCONS_00010537	Testes	Testes related diseases
TCONS_00010158	Testes	Testes related diseases
TCONS_00010544	Testes	Testes related diseases
TCONS_00010547	Kidney	Kidney related diseases
TCONS_00010164	Testes	Testes related diseases
TCONS_00010170	Colon	Colon related diseases
TCONS_00010175	Heart	Heart related diseases
TCONS_00009813	Lung	Lung related diseases
TCONS_00010176	Lung	Lung related diseases
TCONS_l2_00022656	Testes	Testes related diseases
TCONS_00009558	Testes_R	Testes_R related diseases
TCONS_00009572	Testes	Testes related diseases
TCONS_00011526	Whitebloodcell	Whitebloodcell related diseases
TCONS_00011921	Whitebloodcell	Whitebloodcell related diseases
TCONS_00012107	Testes	Testes related diseases
TCONS_00011512	Testes_R	Testes_R related diseases
TCONS_l2_00025431	Testes	Testes related diseases
TCONS_l2_00024834	Testes	Testes related diseases
TCONS_00012221	Whitebloodcell	Whitebloodcell related diseases
TCONS_00011888	Testes	Testes related diseases
TCONS_00011383	Kidney	Kidney related diseases
TCONS_00012013	LymphNode	LymphNode related diseases
TCONS_00012367	Testes	Testes related diseases
TCONS_00011632	Brain	Brain related diseases
TCONS_00012638	Testes_R	Testes_R related diseases
TCONS_00011633	Testes	Testes related diseases
TCONS_00011255	Testes	Testes related diseases
TCONS_00012060	Thyroid	Thyroid related diseases
TCONS_00011258	LymphNode	LymphNode related diseases
TCONS_00011669	Testes	Testes related diseases
TCONS_00011678	Testes	Testes related diseases
TCONS_l2_00024019	Testes	Testes related diseases
TCONS_l2_00025084	Testes	Testes related diseases
TCONS_00011444	Testes	Testes related diseases
TCONS_00011692	Kidney	Kidney related diseases
TCONS_00011269	Testes	Testes related diseases
TCONS_00012086	HLF_r1	HLF_r1 related diseases
TCONS_00011457	Testes	Testes related diseases
TCONS_00012088	Testes	Testes related diseases
TCONS_00012089	Testes	Testes related diseases
TCONS_00011715	Testes	Testes related diseases
TCONS_00012678	Testes	Testes related diseases
TCONS_00011465	Brain	Brain related diseases
TCONS_00011467	Testes	Testes related diseases
TCONS_00011731	Lung	Lung related diseases
TCONS_00011741	Liver	Liver related diseases
TCONS_00012127	Testes	Testes related diseases
TCONS_00012134	Testes	Testes related diseases
TCONS_00012135	Testes	Testes related diseases
TCONS_00011281	Testes	Testes related diseases
TCONS_00012136	Adrenal	Adrenal related diseases
TCONS_00011480	HLF_r1	HLF_r1 related diseases
TCONS_00012141	HLF_r1	HLF_r1 related diseases
TCONS_l2_00025370	Testes	Testes related diseases
TCONS_00012157	Testes_R	Testes_R related diseases
TCONS_00011801	Testes	Testes related diseases
TCONS_00011300	Adrenal	Adrenal related diseases
TCONS_00011483	Brain	Brain related diseases
TCONS_00011810	Testes	Testes related diseases
TCONS_l2_00025385	Testes	Testes related diseases
TCONS_l2_00024744	Testes	Testes related diseases
TCONS_00011815	Thyroid	Thyroid related diseases
TCONS_00012176	Thyroid	Thyroid related diseases
TCONS_00012494	Brain	Brain related diseases
TCONS_00011169	Prostate	Prostate related diseases
TCONS_00011821	Testes	Testes related diseases
TCONS_00011823	Testes_R	Testes_R related diseases
TCONS_00011824	Testes_R	Testes_R related diseases
TCONS_l2_00024786	Adrenal	Adrenal related diseases
TCONS_00011850	Testes	Testes related diseases
TCONS_00011323	Kidney	Kidney related diseases
TCONS_00011324	Testes	Testes related diseases
TCONS_00011855	Testes	Testes related diseases
TCONS_00011856	Kidney	Kidney related diseases
TCONS_00011862	Testes_R	Testes_R related diseases
TCONS_00011875	Liver	Liver related diseases
TCONS_00011877	Testes	Testes related diseases
TCONS_00012218	Prostate	Prostate related diseases
TCONS_00011336	Testes	Testes related diseases
TCONS_l2_00025430	Testes	Testes related diseases
TCONS_l2_00024833	Testes	Testes related diseases
TCONS_l2_00025432	Testes	Testes related diseases
TCONS_00011881	Kidney	Kidney related diseases
TCONS_00011887	Testes	Testes related diseases
TCONS_l2_00025435	Testes	Testes related diseases
TCONS_00011889	Testes	Testes related diseases
TCONS_00011890	Testes	Testes related diseases
TCONS_00012231	Brain	Brain related diseases
TCONS_l2_00024354	Testes	Testes related diseases
TCONS_00012234	Testes	Testes related diseases
TCONS_00011530	Testes_R	Testes_R related diseases
TCONS_00011909	Testes	Testes related diseases
TCONS_00011910	Testes	Testes related diseases
TCONS_00011349	Brain	Brain related diseases
TCONS_00011185	Brain	Brain related diseases
TCONS_00012247	Testes	Testes related diseases
TCONS_00011917	Prostate	Prostate related diseases
TCONS_00011228	Testes	Testes related diseases
TCONS_00011539	Testes	Testes related diseases
TCONS_00011357	Testes	Testes related diseases
TCONS_00011923	Testes	Testes related diseases
TCONS_00011924	Testes	Testes related diseases
TCONS_00011941	Testes	Testes related diseases
TCONS_00012264	Testes	Testes related diseases
TCONS_00012265	Heart	Heart related diseases
TCONS_00011944	Testes	Testes related diseases
TCONS_l2_00025237	HLF_r1	HLF_r1 related diseases
TCONS_l2_00025238	HLF_r1	HLF_r1 related diseases
TCONS_l2_00025239	HLF_r1	HLF_r1 related diseases
TCONS_00012277	Testes	Testes related diseases
TCONS_l2_00024424	Liver	Liver related diseases
TCONS_00011567	Testes	Testes related diseases
TCONS_00011380	Testes	Testes related diseases
TCONS_00011382	Kidney	Kidney related diseases
TCONS_l2_00024447	Colon	Colon related diseases
TCONS_l2_00024454	Thyroid	Thyroid related diseases
TCONS_00011979	Adrenal	Adrenal related diseases
TCONS_00011982	Heart	Heart related diseases
TCONS_00011591	Testes	Testes related diseases
TCONS_00012332	SkeletalMuscle	SkeletalMuscle related diseases
TCONS_00012335	Testes	Testes related diseases
TCONS_00011598	Testes_R	Testes_R related diseases
TCONS_00012813	Testes_R	Testes_R related diseases
TCONS_00011993	Thyroid	Thyroid related diseases
TCONS_00011994	Thyroid	Thyroid related diseases
TCONS_00011997	Testes	Testes related diseases
TCONS_00012002	Thyroid	Thyroid related diseases
TCONS_00012340	Thyroid	Thyroid related diseases
TCONS_00012341	Thyroid	Thyroid related diseases
TCONS_00012342	Prostate	Prostate related diseases
TCONS_00012006	Testes	Testes related diseases
TCONS_00011604	Testes	Testes related diseases
TCONS_00011405	Brain	Brain related diseases
TCONS_l2_00025018	Prostate	Prostate related diseases
TCONS_00012355	Testes	Testes related diseases
TCONS_00012014	Brain	Brain related diseases
TCONS_l2_00024523	Testes	Testes related diseases
TCONS_00012017	Testes	Testes related diseases
TCONS_00011618	Testes	Testes related diseases
TCONS_00012365	Testes	Testes related diseases
TCONS_00012366	Testes	Testes related diseases
TCONS_00012022	Testes	Testes related diseases
TCONS_00011420	Testes	Testes related diseases
TCONS_00011421	Testes	Testes related diseases
TCONS_00012024	Foreskin	Foreskin related diseases
TCONS_00011246	Adrenal	Adrenal related diseases
TCONS_00012027	Heart	Heart related diseases
TCONS_00012631	Heart	Heart related diseases
TCONS_00012376	Thyroid	Thyroid related diseases
TCONS_l2_00027313	Testes	Testes related diseases
TCONS_00013804	Kidney	Kidney related diseases
TCONS_00013803	Kidney	Kidney related diseases
TCONS_00013225	HLF_r1	HLF_r1 related diseases
TCONS_00014403	HLF_r1	HLF_r1 related diseases
TCONS_00013698	Testes	Testes related diseases
TCONS_l2_00027062	Testes_R	Testes_R related diseases
TCONS_l2_00025700	Testes_R	Testes_R related diseases
TCONS_l2_00027334	Testes	Testes related diseases
TCONS_l2_00026521	Testes	Testes related diseases
TCONS_l2_00027351	Testes	Testes related diseases
TCONS_l2_00027352	Testes	Testes related diseases
TCONS_l2_00027412	Testes	Testes related diseases
TCONS_l2_00027168	Lung	Lung related diseases
TCONS_l2_00027170	Lung	Lung related diseases
TCONS_l2_00027169	Lung	Lung related diseases
TCONS_00013205	Brain	Brain related diseases
TCONS_00013221	Kidney	Kidney related diseases
TCONS_00013563	Testes	Testes related diseases
TCONS_l2_00027194	Testes	Testes related diseases
TCONS_l2_00027211	Brain	Brain related diseases
TCONS_00013993	Testes	Testes related diseases
TCONS_00013273	Testes_R	Testes_R related diseases
TCONS_00013110	LymphNode	LymphNode related diseases
TCONS_00013671	Thyroid	Thyroid related diseases
TCONS_00013289	Brain	Brain related diseases
TCONS_00013118	Testes	Testes related diseases
TCONS_00013679	Testes_R	Testes_R related diseases
TCONS_00013683	Brain	Brain related diseases
TCONS_00012949	Testes	Testes related diseases
TCONS_00013699	Testes	Testes related diseases
TCONS_00013350	Brain	Brain related diseases
TCONS_00013728	Kidney	Kidney related diseases
TCONS_l2_00025724	Testes	Testes related diseases
TCONS_00014088	Testes	Testes related diseases
TCONS_00013382	Testes	Testes related diseases
TCONS_00013397	Testes	Testes related diseases
TCONS_00013752	Prostate	Prostate related diseases
TCONS_00013398	Testes	Testes related diseases
TCONS_00012984	Testes	Testes related diseases
TCONS_00014097	Testes	Testes related diseases
TCONS_00013399	Testes	Testes related diseases
TCONS_00013407	Testes	Testes related diseases
TCONS_l2_00026501	Testes	Testes related diseases
TCONS_00013151	Ovary	Ovary related diseases
TCONS_00013155	Heart	Heart related diseases
TCONS_00012993	Testes	Testes related diseases
TCONS_00012877	Testes_R	Testes_R related diseases
TCONS_00013412	Testes_R	Testes_R related diseases
TCONS_00012994	Whitebloodcell	Whitebloodcell related diseases
TCONS_00012996	Kidney	Kidney related diseases
TCONS_00013414	Testes_R	Testes_R related diseases
TCONS_l2_00025816	Testes	Testes related diseases
TCONS_00013158	Prostate	Prostate related diseases
TCONS_00013784	Breast	Breast related diseases
TCONS_00013434	Brain	Brain related diseases
TCONS_00013005	Lung	Lung related diseases
TCONS_00013167	Testes	Testes related diseases
TCONS_00013443	Testes	Testes related diseases
TCONS_00013010	Prostate	Prostate related diseases
TCONS_00013445	Testes	Testes related diseases
TCONS_00013802	Kidney	Kidney related diseases
TCONS_00013806	HLF_r1	HLF_r1 related diseases
TCONS_00013016	LymphNode	LymphNode related diseases
TCONS_l2_00026573	Testes	Testes related diseases
TCONS_00013453	Testes	Testes related diseases
TCONS_l2_00026594	Brain	Brain related diseases
TCONS_00013823	Testes	Testes related diseases
TCONS_l2_00025907	Testes	Testes related diseases
TCONS_l2_00027370	Testes	Testes related diseases
TCONS_l2_00026607	Testes	Testes related diseases
TCONS_l2_00027371	Testes	Testes related diseases
TCONS_00013465	Testes_R	Testes_R related diseases
TCONS_00013179	Testes_R	Testes_R related diseases
TCONS_l2_00025936	Thyroid	Thyroid related diseases
TCONS_00013478	Testes	Testes related diseases
TCONS_00013018	Testes	Testes related diseases
TCONS_00013857	Testes	Testes related diseases
TCONS_00013020	Testes	Testes related diseases
TCONS_l2_00027413	Testes	Testes related diseases
TCONS_00014334	Testes_R	Testes_R related diseases
TCONS_l2_00027414	Testes	Testes related diseases
TCONS_l2_00026680	Testes	Testes related diseases
TCONS_00013515	Brain	Brain related diseases
TCONS_00013875	Testes	Testes related diseases
TCONS_00013876	Testes	Testes related diseases
TCONS_00014349	Testes	Testes related diseases
TCONS_00012885	Kidney	Kidney related diseases
TCONS_00013033	Kidney	Kidney related diseases
TCONS_00013525	Lung	Lung related diseases
TCONS_l2_00026091	Lung	Lung related diseases
TCONS_00013884	Brain	Brain related diseases
TCONS_l2_00026092	Lung	Lung related diseases
TCONS_l2_00026747	Testes	Testes related diseases
TCONS_00013206	Whitebloodcell	Whitebloodcell related diseases
TCONS_00013543	Testes	Testes related diseases
TCONS_l2_00027181	Testes	Testes related diseases
TCONS_l2_00026819	Liver	Liver related diseases
TCONS_00013053	HLF_r1	HLF_r1 related diseases
TCONS_00013910	Testes	Testes related diseases
TCONS_00013557	LymphNode	LymphNode related diseases
TCONS_00013220	Kidney	Kidney related diseases
TCONS_00013559	Whitebloodcell	Whitebloodcell related diseases
TCONS_00013223	Testes	Testes related diseases
TCONS_00013564	Testes	Testes related diseases
TCONS_l2_00026160	Testes	Testes related diseases
TCONS_00013568	Testes	Testes related diseases
TCONS_00013229	Heart	Heart related diseases
TCONS_00013929	Testes	Testes related diseases
TCONS_00013930	Testes	Testes related diseases
TCONS_00013570	Testes	Testes related diseases
TCONS_00013067	Testes	Testes related diseases
TCONS_00013068	Brain	Brain related diseases
TCONS_00013573	SkeletalMuscle	SkeletalMuscle related diseases
TCONS_00013071	Brain	Brain related diseases
TCONS_00013574	Brain	Brain related diseases
TCONS_l2_00027212	Kidney	Kidney related diseases
TCONS_l2_00026181	Kidney	Kidney related diseases
TCONS_l2_00027213	Kidney	Kidney related diseases
TCONS_l2_00026182	Kidney	Kidney related diseases
TCONS_00013583	Testes_R	Testes_R related diseases
TCONS_00013582	Testes_R	Testes_R related diseases
TCONS_00014207	Testes_R	Testes_R related diseases
TCONS_00013077	Testes	Testes related diseases
TCONS_00013947	Testes	Testes related diseases
TCONS_00013252	Testes	Testes related diseases
TCONS_00013584	Adrenal	Adrenal related diseases
TCONS_00013948	Whitebloodcell	Whitebloodcell related diseases
TCONS_00014212	Testes	Testes related diseases
TCONS_00013590	Testes_R	Testes_R related diseases
TCONS_00013974	Liver	Liver related diseases
TCONS_00013605	Whitebloodcell	Whitebloodcell related diseases
TCONS_00013979	Testes_R	Testes_R related diseases
TCONS_l2_00026236	Testes	Testes related diseases
TCONS_00013610	Testes	Testes related diseases
TCONS_00013981	Testes	Testes related diseases
TCONS_l2_00026248	LymphNode	LymphNode related diseases
TCONS_00013994	Thyroid	Thyroid related diseases
TCONS_00013995	Testes	Testes related diseases
TCONS_00014010	Testes	Testes related diseases
TCONS_00013648	Kidney	Kidney related diseases
TCONS_00013100	Kidney	Kidney related diseases
TCONS_00014032	Testes	Testes related diseases
TCONS_00014238	Testes_R	Testes_R related diseases
TCONS_00013652	Testes_R	Testes_R related diseases
TCONS_00013654	Prostate	Prostate related diseases
TCONS_00014243	Prostate	Prostate related diseases
TCONS_00014496	Placenta_R	Placenta_R related diseases
TCONS_00015291	Placenta_R	Placenta_R related diseases
TCONS_l2_00027747	HLF_r1	HLF_r1 related diseases
TCONS_00014859	Brain	Brain related diseases
TCONS_00014948	Brain	Brain related diseases
TCONS_00014982	Colon	Colon related diseases
TCONS_00015024	Testes	Testes related diseases
TCONS_00014741	Testes	Testes related diseases
TCONS_00014742	Testes	Testes related diseases
TCONS_00014755	HLF_r1	HLF_r1 related diseases
TCONS_00015044	Testes	Testes related diseases
TCONS_00014836	Testes	Testes related diseases
TCONS_00015148	HLF_r1	HLF_r1 related diseases
TCONS_00015166	Testes_R	Testes_R related diseases
TCONS_00015182	Testes	Testes related diseases
TCONS_00014570	Testes	Testes related diseases
TCONS_00014577	Testes	Testes related diseases
TCONS_00014579	Heart	Heart related diseases
TCONS_00014912	Brain	Brain related diseases
TCONS_00014914	Testes	Testes related diseases
TCONS_00014918	Testes	Testes related diseases
TCONS_00014593	Testes	Testes related diseases
TCONS_00014929	Testes	Testes related diseases
TCONS_00014933	Liver	Liver related diseases
TCONS_00014937	Testes	Testes related diseases
TCONS_00014940	Testes	Testes related diseases
TCONS_00014943	Breast	Breast related diseases
TCONS_00014650	Thyroid	Thyroid related diseases
TCONS_00014659	Testes	Testes related diseases
TCONS_00014957	Prostate	Prostate related diseases
TCONS_00014958	Testes_R	Testes_R related diseases
TCONS_00014475	SkeletalMuscle	SkeletalMuscle related diseases
TCONS_00014555	SkeletalMuscle	SkeletalMuscle related diseases
TCONS_00014663	Testes	Testes related diseases
TCONS_00014671	Testes	Testes related diseases
TCONS_00014675	Adrenal	Adrenal related diseases
TCONS_l2_00027730	Testes	Testes related diseases
TCONS_00014681	Liver	Liver related diseases
TCONS_00014986	Thyroid	Thyroid related diseases
TCONS_00014987	Kidney	Kidney related diseases
TCONS_00014997	Testes	Testes related diseases
TCONS_l2_00027738	Adrenal	Adrenal related diseases
TCONS_00014999	Testes	Testes related diseases
TCONS_00015000	Adrenal	Adrenal related diseases
TCONS_00015439	Adrenal	Adrenal related diseases
TCONS_00014693	Testes	Testes related diseases
TCONS_00014694	Testes	Testes related diseases
TCONS_00015002	Adipose	Adipose related diseases
TCONS_00014700	Liver	Liver related diseases
TCONS_00014701	Testes	Testes related diseases
TCONS_00014706	Testes	Testes related diseases
TCONS_00014718	Placenta_R	Placenta_R related diseases
TCONS_00014721	Testes	Testes related diseases
TCONS_00014722	Testes	Testes related diseases
TCONS_00015021	Testes	Testes related diseases
TCONS_00014518	HLF_r1	HLF_r1 related diseases
TCONS_00014519	Testes_R	Testes_R related diseases
TCONS_00015025	Brain	Brain related diseases
TCONS_00015026	Testes_R	Testes_R related diseases
TCONS_00015029	Testes	Testes related diseases
TCONS_00014746	HLF_r1	HLF_r1 related diseases
TCONS_00014747	Kidney	Kidney related diseases
TCONS_00014752	Testes	Testes related diseases
TCONS_00015041	Testes	Testes related diseases
TCONS_00015040	Testes	Testes related diseases
TCONS_00015452	Testes	Testes related diseases
TCONS_00014766	Testes	Testes related diseases
TCONS_00015042	Testes	Testes related diseases
TCONS_00015043	Testes	Testes related diseases
TCONS_00014542	Testes	Testes related diseases
TCONS_00014782	Testes	Testes related diseases
TCONS_l2_00028266	Whitebloodcell	Whitebloodcell related diseases
TCONS_l2_00028267	Adipose	Adipose related diseases
TCONS_00014789	Testes	Testes related diseases
TCONS_00014790	Testes	Testes related diseases
TCONS_00015067	Testes	Testes related diseases
TCONS_00015083	Testes	Testes related diseases
TCONS_00015324	Testes_R	Testes_R related diseases
TCONS_00015108	Kidney	Kidney related diseases
TCONS_00014801	Testes	Testes related diseases
TCONS_00014802	Testes	Testes related diseases
TCONS_00015110	Testes	Testes related diseases
TCONS_00015112	Testes	Testes related diseases
TCONS_00014811	LymphNode	LymphNode related diseases
TCONS_00014812	Brain	Brain related diseases
TCONS_00014813	Testes	Testes related diseases
TCONS_00015131	Liver	Liver related diseases
TCONS_00015132	Testes	Testes related diseases
TCONS_00015133	Testes	Testes related diseases
TCONS_00014830	Testes	Testes related diseases
TCONS_00015139	Testes	Testes related diseases
TCONS_00015145	HLF_r1	HLF_r1 related diseases
TCONS_00015146	HLF_r1	HLF_r1 related diseases
TCONS_00015149	HLF_r1	HLF_r1 related diseases
TCONS_00015492	HLF_r1	HLF_r1 related diseases
TCONS_00015150	HLF_r1	HLF_r1 related diseases
TCONS_00015151	Testes_R	Testes_R related diseases
TCONS_00015156	Kidney	Kidney related diseases
TCONS_00015157	Testes	Testes related diseases
TCONS_00014536	Adrenal	Adrenal related diseases
TCONS_00014538	Whitebloodcell	Whitebloodcell related diseases
TCONS_00014481	Whitebloodcell	Whitebloodcell related diseases
TCONS_00014860	Brain	Brain related diseases
TCONS_00014861	Kidney	Kidney related diseases
TCONS_00015368	Kidney	Kidney related diseases
TCONS_00015367	Kidney	Kidney related diseases
TCONS_00015370	Kidney	Kidney related diseases
TCONS_00015369	Kidney	Kidney related diseases
TCONS_00014865	Kidney	Kidney related diseases
TCONS_00014548	Testes_R	Testes_R related diseases
TCONS_l2_00028516	Testes	Testes related diseases
TCONS_l2_00028517	Testes	Testes related diseases
TCONS_l2_00027992	Testes	Testes related diseases
TCONS_00014870	Testes	Testes related diseases
TCONS_00014876	SkeletalMuscle	SkeletalMuscle related diseases
TCONS_00014470	Breast	Breast related diseases
TCONS_00014880	Whitebloodcell	Whitebloodcell related diseases
TCONS_00014881	Testes	Testes related diseases
TCONS_00015185	LymphNode	LymphNode related diseases
TCONS_00016201	Placenta_R	Placenta_R related diseases
TCONS_00015916	Testes_R	Testes_R related diseases
TCONS_00016530	Adipose	Adipose related diseases
TCONS_00015915	Testes	Testes related diseases
TCONS_00015648	Brain	Brain related diseases
TCONS_00016284	Liver	Liver related diseases
TCONS_00016057	Whitebloodcell	Whitebloodcell related diseases
TCONS_00016140	Testes	Testes related diseases
TCONS_00015746	Prostate	Prostate related diseases
TCONS_00015882	Testes	Testes related diseases
TCONS_00016245	Thyroid	Thyroid related diseases
TCONS_00016244	Thyroid	Thyroid related diseases
TCONS_00016246	Kidney	Kidney related diseases
TCONS_l2_00029897	Testes	Testes related diseases
TCONS_00016264	Testes	Testes related diseases
TCONS_00015793	Testes	Testes related diseases
TCONS_00015918	Testes	Testes related diseases
TCONS_00015919	Brain	Brain related diseases
TCONS_00015794	Testes	Testes related diseases
TCONS_00016273	Testes	Testes related diseases
TCONS_00015920	Heart	Heart related diseases
TCONS_l2_00028644	Testes	Testes related diseases
TCONS_00015935	Prostate	Prostate related diseases
TCONS_00016286	Kidney	Kidney related diseases
TCONS_00015939	Lung	Lung related diseases
TCONS_00016287	Testes	Testes related diseases
TCONS_00016289	Testes	Testes related diseases
TCONS_00015943	Testes	Testes related diseases
TCONS_00016551	Testes	Testes related diseases
TCONS_00016312	Adrenal	Adrenal related diseases
TCONS_00015805	Testes	Testes related diseases
TCONS_00015974	LymphNode	LymphNode related diseases
TCONS_00015975	Testes	Testes related diseases
TCONS_00015818	Brain	Brain related diseases
TCONS_00015821	Brain	Brain related diseases
TCONS_00015683	Brain	Brain related diseases
TCONS_00015684	Brain	Brain related diseases
TCONS_00016002	Testes	Testes related diseases
TCONS_00016356	Brain	Brain related diseases
TCONS_00016012	Testes	Testes related diseases
TCONS_00016357	Testes	Testes related diseases
TCONS_00016616	Testes	Testes related diseases
TCONS_00016014	Heart	Heart related diseases
TCONS_00016358	Testes	Testes related diseases
TCONS_00016359	Testes	Testes related diseases
TCONS_00016368	Testes	Testes related diseases
TCONS_00015839	LymphNode	LymphNode related diseases
TCONS_00016378	Testes	Testes related diseases
TCONS_00016029	Testes	Testes related diseases
TCONS_00016039	Testes	Testes related diseases
TCONS_00016040	Testes	Testes related diseases
TCONS_00015840	Testes	Testes related diseases
TCONS_00016054	Testes	Testes related diseases
TCONS_00016396	Ovary	Ovary related diseases
TCONS_00016056	Testes	Testes related diseases
TCONS_00016063	Testes	Testes related diseases
TCONS_00016401	Testes	Testes related diseases
TCONS_00016064	Testes	Testes related diseases
TCONS_00016648	HLF_r1	HLF_r1 related diseases
TCONS_00015849	Brain	Brain related diseases
TCONS_00015718	Testes	Testes related diseases
TCONS_00016657	Testes_R	Testes_R related diseases
TCONS_00015722	Testes	Testes related diseases
TCONS_00016106	Testes	Testes related diseases
TCONS_00016450	Testes	Testes related diseases
TCONS_00016124	Testes	Testes related diseases
TCONS_00016459	Testes	Testes related diseases
TCONS_00016126	Testes	Testes related diseases
TCONS_00016129	Testes	Testes related diseases
TCONS_00015874	Ovary	Ovary related diseases
TCONS_00016470	Placenta_R	Placenta_R related diseases
TCONS_00015571	Placenta_R	Placenta_R related diseases
TCONS_00015876	Prostate	Prostate related diseases
TCONS_00016676	Brain	Brain related diseases
TCONS_l2_00030072	Lung	Lung related diseases
TCONS_l2_00029573	Lung	Lung related diseases
TCONS_00016472	Testes	Testes related diseases
TCONS_00016143	Testes	Testes related diseases
TCONS_00016151	Testes_R	Testes_R related diseases
TCONS_l2_00030075	Brain	Brain related diseases
TCONS_l2_00029586	Brain	Brain related diseases
TCONS_00015883	Testes	Testes related diseases
TCONS_00015884	Testes	Testes related diseases
TCONS_00016496	Testes	Testes related diseases
TCONS_l2_00029094	Lung	Lung related diseases
TCONS_00016205	Kidney	Kidney related diseases
TCONS_00016892	Liver	Liver related diseases
TCONS_00016206	Liver	Liver related diseases
TCONS_00016207	Liver	Liver related diseases
TCONS_00015773	Ovary	Ovary related diseases
TCONS_00016212	Testes	Testes related diseases
TCONS_00015893	Lung	Lung related diseases
TCONS_00015559	Thyroid	Thyroid related diseases
TCONS_00016503	Adrenal	Adrenal related diseases
TCONS_00015776	Thyroid	Thyroid related diseases
TCONS_l2_00029880	Prostate	Prostate related diseases
TCONS_l2_00029116	Prostate	Prostate related diseases
TCONS_00016732	Testes	Testes related diseases
TCONS_00017301	Testes	Testes related diseases
TCONS_00017416	Liver	Liver related diseases
TCONS_00017415	Liver	Liver related diseases
TCONS_00017120	Whitebloodcell	Whitebloodcell related diseases
TCONS_00016974	Thyroid	Thyroid related diseases
TCONS_00016975	Thyroid	Thyroid related diseases
TCONS_l2_00030689	Testes	Testes related diseases
TCONS_00017171	Breast	Breast related diseases
TCONS_00017060	Testes	Testes related diseases
TCONS_00017362	Breast	Breast related diseases
TCONS_00017103	Lung	Lung related diseases
TCONS_00017104	Lung	Lung related diseases
TCONS_00016961	Adrenal	Adrenal related diseases
TCONS_00017030	Adrenal	Adrenal related diseases
TCONS_00017037	Testes	Testes related diseases
TCONS_00017289	Testes	Testes related diseases
TCONS_00017139	Testes	Testes related diseases
TCONS_00017292	Lung	Lung related diseases
TCONS_l2_00030150	Testes_R	Testes_R related diseases
TCONS_00016969	Ovary	Ovary related diseases
TCONS_00017146	Testes	Testes related diseases
TCONS_00017410	Testes	Testes related diseases
TCONS_00017149	Testes	Testes related diseases
TCONS_00017154	Testes	Testes related diseases
TCONS_00017155	Testes	Testes related diseases
TCONS_00017156	Lung	Lung related diseases
TCONS_00016979	Brain	Brain related diseases
TCONS_00017157	Testes	Testes related diseases
TCONS_00017159	Ovary	Ovary related diseases
TCONS_00017160	Testes	Testes related diseases
TCONS_00017163	Testes	Testes related diseases
TCONS_l2_00030690	Testes	Testes related diseases
TCONS_00017322	Testes	Testes related diseases
TCONS_00017192	Testes	Testes related diseases
TCONS_00017345	Prostate	Prostate related diseases
TCONS_00017351	Testes	Testes related diseases
TCONS_00017000	Whitebloodcell	Whitebloodcell related diseases
TCONS_00016999	Whitebloodcell	Whitebloodcell related diseases
TCONS_l2_00030270	Testes	Testes related diseases
TCONS_00017209	Testes	Testes related diseases
TCONS_00017449	HLF_r1	HLF_r1 related diseases
TCONS_00017226	Liver	Liver related diseases
TCONS_00017006	Prostate	Prostate related diseases
TCONS_00017007	Prostate	Prostate related diseases
TCONS_00017365	Testes	Testes related diseases
TCONS_00017234	Testes	Testes related diseases
TCONS_00017461	Heart	Heart related diseases
TCONS_00017462	Heart	Heart related diseases
TCONS_l2_00030743	Testes	Testes related diseases
TCONS_00017242	Thyroid	Thyroid related diseases
TCONS_00017097	Testes	Testes related diseases
TCONS_00017270	Testes	Testes related diseases
TCONS_00017024	SkeletalMuscle	SkeletalMuscle related diseases
TCONS_00017025	SkeletalMuscle	SkeletalMuscle related diseases
TCONS_00017273	Testes	Testes related diseases
TCONS_l2_00030937	Prostate	Prostate related diseases
TCONS_00017629	Whitebloodcell	Whitebloodcell related diseases
TCONS_l2_00031011	Testes	Testes related diseases
TCONS_00017569	Testes	Testes related diseases
TCONS_00017654	Testes	Testes related diseases
TCONS_00017631	Testes	Testes related diseases
TCONS_00017632	Brain_R	Brain_R related diseases
TCONS_00017584	Testes	Testes related diseases
TCONS_00017645	Testes	Testes related diseases
TCONS_l2_00030926	Testes	Testes related diseases
TCONS_l2_00031022	Testes	Testes related diseases
TCONS_l2_00031038	Testes	Testes related diseases
TCONS_l2_00031037	Testes	Testes related diseases
TCONS_00017588	Testes	Testes related diseases
TCONS_00017577	Testes	Testes related diseases
TCONS_l2_00030927	Testes	Testes related diseases
TCONS_l2_00030928	Testes	Testes related diseases
TCONS_00017637	Testes	Testes related diseases
TCONS_00017638	Adrenal	Adrenal related diseases
TCONS_00017639	Testes	Testes related diseases
TCONS_l2_00031052	Testes	Testes related diseases
TCONS_00017592	Testes	Testes related diseases
TCONS_l2_00031002	Testes	Testes related diseases
TCONS_00017658	Testes_R	Testes_R related diseases
TCONS_00017722	Whitebloodcell	Whitebloodcell related diseases
TCONS_00017768	SkeletalMuscle	SkeletalMuscle related diseases
TCONS_00018686	Brain	Brain related diseases
TCONS_00017799	Brain	Brain related diseases
TCONS_00018147	Testes	Testes related diseases
TCONS_00017987	Testes	Testes related diseases
TCONS_00018764	Brain	Brain related diseases
TCONS_00018040	Lung	Lung related diseases
TCONS_00018358	Testes	Testes related diseases
TCONS_l2_00004049	Testes_R	Testes_R related diseases
TCONS_00017756	Testes	Testes related diseases
TCONS_00017757	Testes	Testes related diseases
TCONS_00018404	Testes	Testes related diseases
TCONS_00017767	Kidney	Kidney related diseases
TCONS_00018086	Testes	Testes related diseases
TCONS_00018873	Testes	Testes related diseases
TCONS_00018872	Testes	Testes related diseases
TCONS_00017770	Thyroid	Thyroid related diseases
TCONS_00018414	Testes_R	Testes_R related diseases
TCONS_00018415	Testes	Testes related diseases
TCONS_00018094	SkeletalMuscle	SkeletalMuscle related diseases
TCONS_00018417	SkeletalMuscle	SkeletalMuscle related diseases
TCONS_00018418	SkeletalMuscle	SkeletalMuscle related diseases
TCONS_00018420	Breast	Breast related diseases
TCONS_00018115	Testes_R	Testes_R related diseases
TCONS_00018117	Testes	Testes related diseases
TCONS_00017923	Testes	Testes related diseases
TCONS_00017731	Testes	Testes related diseases
TCONS_00017785	Testes	Testes related diseases
TCONS_00018124	Thyroid	Thyroid related diseases
TCONS_00017790	Adrenal	Adrenal related diseases
TCONS_00017793	Testes	Testes related diseases
TCONS_00017792	Testes	Testes related diseases
TCONS_00017796	Testes	Testes related diseases
TCONS_00018132	Testes	Testes related diseases
TCONS_l2_00002904	Testes	Testes related diseases
TCONS_l2_00002905	Testes	Testes related diseases
TCONS_00017937	Testes	Testes related diseases
TCONS_l2_00002906	Testes	Testes related diseases
TCONS_00018133	Testes	Testes related diseases
TCONS_00018684	Testes	Testes related diseases
TCONS_00018683	Testes	Testes related diseases
TCONS_00017938	LymphNode	LymphNode related diseases
TCONS_00018449	Testes	Testes related diseases
TCONS_00018134	Testes	Testes related diseases
TCONS_00018142	Testes	Testes related diseases
TCONS_00018456	Testes	Testes related diseases
TCONS_00018148	Testes	Testes related diseases
TCONS_00018150	Testes	Testes related diseases
TCONS_00018151	Testes	Testes related diseases
TCONS_00018704	Liver	Liver related diseases
TCONS_00018703	Liver	Liver related diseases
TCONS_00017805	LymphNode	LymphNode related diseases
TCONS_l2_00004133	Testes	Testes related diseases
TCONS_l2_00003472	Testes	Testes related diseases
TCONS_00017812	Thyroid	Thyroid related diseases
TCONS_00018160	Testes_R	Testes_R related diseases
TCONS_00018161	Testes	Testes related diseases
TCONS_00018191	Testes	Testes related diseases
TCONS_00018496	Testes	Testes related diseases
TCONS_l2_00003966	Testes	Testes related diseases
TCONS_l2_00003035	Testes	Testes related diseases
TCONS_l2_00003036	Testes	Testes related diseases
TCONS_00018499	Breast	Breast related diseases
TCONS_00018504	Testes	Testes related diseases
TCONS_00017980	Foreskin	Foreskin related diseases
TCONS_l2_00003581	Testes_R	Testes_R related diseases
TCONS_00018516	Testes	Testes related diseases
TCONS_00018521	Testes	Testes related diseases
TCONS_00018522	Thyroid	Thyroid related diseases
TCONS_00018207	Testes_R	Testes_R related diseases
TCONS_00018526	Testes	Testes related diseases
TCONS_00018527	Testes	Testes related diseases
TCONS_00018229	Testes	Testes related diseases
TCONS_00018950	Heart	Heart related diseases
TCONS_00018949	Heart	Heart related diseases
TCONS_00018533	Testes	Testes related diseases
TCONS_00018247	Testes	Testes related diseases
TCONS_00018002	Whitebloodcell	Whitebloodcell related diseases
TCONS_00018003	Whitebloodcell	Whitebloodcell related diseases
TCONS_00018557	Testes	Testes related diseases
TCONS_00018558	Testes	Testes related diseases
TCONS_00018010	Testes	Testes related diseases
TCONS_00017849	Testes	Testes related diseases
TCONS_00018257	Testes	Testes related diseases
TCONS_00017850	Testes	Testes related diseases
TCONS_00018560	Testes	Testes related diseases
TCONS_00018268	LymphNode	LymphNode related diseases
TCONS_00018273	Thyroid	Thyroid related diseases
TCONS_00017745	Testes	Testes related diseases
TCONS_00018281	Testes	Testes related diseases
TCONS_00018282	Testes	Testes related diseases
TCONS_00018022	Brain	Brain related diseases
TCONS_00018783	Heart	Heart related diseases
TCONS_00017857	Heart	Heart related diseases
TCONS_00018283	Testes_R	Testes_R related diseases
TCONS_00018284	Heart	Heart related diseases
TCONS_00018025	Testes	Testes related diseases
TCONS_00018289	Adrenal	Adrenal related diseases
TCONS_00017748	Colon	Colon related diseases
TCONS_00017714	Colon	Colon related diseases
TCONS_00018312	Testes	Testes related diseases
TCONS_00018034	Testes	Testes related diseases
TCONS_00018319	Testes	Testes related diseases
TCONS_00018320	Testes	Testes related diseases
TCONS_00018321	Testes	Testes related diseases
TCONS_00017862	Testes	Testes related diseases
TCONS_00018599	Testes	Testes related diseases
TCONS_00018332	Testes	Testes related diseases
TCONS_00018335	Whitebloodcell	Whitebloodcell related diseases
TCONS_00018336	Adrenal	Adrenal related diseases
TCONS_00018343	Testes	Testes related diseases
TCONS_00018617	Testes	Testes related diseases
TCONS_00018618	Kidney	Kidney related diseases
TCONS_00018360	Prostate	Prostate related diseases
TCONS_00018619	Colon	Colon related diseases
TCONS_l2_00004050	Testes_R	Testes_R related diseases
TCONS_00018640	Adrenal	Adrenal related diseases
TCONS_00018385	Testes	Testes related diseases
TCONS_00018646	Testes	Testes related diseases
TCONS_00018647	Testes_R	Testes_R related diseases
TCONS_00018397	Whitebloodcell	Whitebloodcell related diseases
TCONS_00019241	Prostate	Prostate related diseases
TCONS_l2_00005000	Testes	Testes related diseases
TCONS_00019382	Heart	Heart related diseases
TCONS_00019717	Kidney	Kidney related diseases
TCONS_00019163	Prostate	Prostate related diseases
TCONS_l2_00004897	Thyroid	Thyroid related diseases
TCONS_00019231	Testes	Testes related diseases
TCONS_00019574	Whitebloodcell	Whitebloodcell related diseases
TCONS_00019577	Prostate	Prostate related diseases
TCONS_00019239	Testes_R	Testes_R related diseases
TCONS_00019242	Kidney	Kidney related diseases
TCONS_00019243	Kidney	Kidney related diseases
TCONS_00019584	Testes	Testes related diseases
TCONS_00019246	Kidney	Kidney related diseases
TCONS_l2_00004425	Testes_R	Testes_R related diseases
TCONS_00019083	Liver	Liver related diseases
TCONS_00019251	Lung	Lung related diseases
TCONS_00019252	Testes_R	Testes_R related diseases
TCONS_00019256	Testes	Testes related diseases
TCONS_00019258	Testes	Testes related diseases
TCONS_00019592	Testes	Testes related diseases
TCONS_00019593	Testes	Testes related diseases
TCONS_00020054	HLF_r1	HLF_r1 related diseases
TCONS_00020053	HLF_r1	HLF_r1 related diseases
TCONS_00019121	HLF_r1	HLF_r1 related diseases
TCONS_00019597	HLF_r1	HLF_r1 related diseases
TCONS_00019603	Testes	Testes related diseases
TCONS_00019611	Testes	Testes related diseases
TCONS_00019273	Placenta_R	Placenta_R related diseases
TCONS_00019615	Lung	Lung related diseases
TCONS_00019616	Prostate	Prostate related diseases
TCONS_00019275	Testes	Testes related diseases
TCONS_00019277	Testes	Testes related diseases
TCONS_00019278	Testes	Testes related diseases
TCONS_00019620	Testes	Testes related diseases
TCONS_00019621	Testes	Testes related diseases
TCONS_00019282	Testes_R	Testes_R related diseases
TCONS_00019628	Testes	Testes related diseases
TCONS_00019285	Testes	Testes related diseases
TCONS_00019091	Testes	Testes related diseases
TCONS_00019299	Testes	Testes related diseases
TCONS_l2_00004999	Testes	Testes related diseases
TCONS_00019636	Testes	Testes related diseases
TCONS_l2_00005372	Testes	Testes related diseases
TCONS_00019639	HLF_r1	HLF_r1 related diseases
TCONS_00019306	Thyroid	Thyroid related diseases
TCONS_00019311	Testes	Testes related diseases
TCONS_00019645	Thyroid	Thyroid related diseases
TCONS_00019646	Testes	Testes related diseases
TCONS_00019647	Testes	Testes related diseases
TCONS_00019652	Prostate	Prostate related diseases
TCONS_00019172	Testes	Testes related diseases
TCONS_00019658	Testes	Testes related diseases
TCONS_00019680	Kidney	Kidney related diseases
TCONS_00019361	Adrenal	Adrenal related diseases
TCONS_00019367	Testes	Testes related diseases
TCONS_00019370	Liver	Liver related diseases
TCONS_00019369	Liver	Liver related diseases
TCONS_00019371	Testes	Testes related diseases
TCONS_00019942	Testes	Testes related diseases
TCONS_00019702	Thyroid	Thyroid related diseases
TCONS_00019705	Testes	Testes related diseases
TCONS_00019124	Testes	Testes related diseases
TCONS_00019708	Testes	Testes related diseases
TCONS_00019400	Testes	Testes related diseases
TCONS_00019404	Breast	Breast related diseases
TCONS_00019406	Testes	Testes related diseases
TCONS_00019407	Testes	Testes related diseases
TCONS_00019433	Testes	Testes related diseases
TCONS_00019967	Testes	Testes related diseases
TCONS_00019441	Testes	Testes related diseases
TCONS_00019731	Testes	Testes related diseases
TCONS_00019448	Adrenal	Adrenal related diseases
TCONS_00019449	Testes	Testes related diseases
TCONS_00020122	Testes_R	Testes_R related diseases
TCONS_00019738	Testes	Testes related diseases
TCONS_00019986	Liver	Liver related diseases
TCONS_00019452	Liver	Liver related diseases
TCONS_00019741	Adipose	Adipose related diseases
TCONS_00019457	Testes	Testes related diseases
TCONS_00019749	Testes	Testes related diseases
TCONS_00019753	Testes	Testes related diseases
TCONS_00019760	Testes	Testes related diseases
TCONS_00019477	Testes_R	Testes_R related diseases
TCONS_00019765	Testes	Testes related diseases
TCONS_00019769	Adrenal	Adrenal related diseases
TCONS_00019998	Testes_R	Testes_R related diseases
TCONS_00019481	Testes_R	Testes_R related diseases
TCONS_00019499	Kidney	Kidney related diseases
TCONS_00019502	Colon	Colon related diseases
TCONS_00019509	Brain	Brain related diseases
TCONS_00019510	Thyroid	Thyroid related diseases
TCONS_00019512	Testes	Testes related diseases
TCONS_00019531	Testes	Testes related diseases
TCONS_00020154	Testes	Testes related diseases
TCONS_00019540	Prostate	Prostate related diseases
TCONS_00019806	Testes	Testes related diseases
TCONS_00019807	Testes	Testes related diseases
TCONS_00019542	Testes	Testes related diseases
TCONS_00019160	Testes	Testes related diseases
TCONS_00019544	Testes	Testes related diseases
TCONS_00020447	Testes_R	Testes_R related diseases
TCONS_00020866	Adrenal	Adrenal related diseases
TCONS_00020511	Adrenal	Adrenal related diseases
TCONS_00020516	Ovary	Ovary related diseases
TCONS_00020906	Brain	Brain related diseases
TCONS_00020576	Kidney	Kidney related diseases
TCONS_00020667	Brain	Brain related diseases
TCONS_00020275	Kidney	Kidney related diseases
TCONS_00020677	Adrenal	Adrenal related diseases
TCONS_00020679	Testes	Testes related diseases
TCONS_00020280	Testes_R	Testes_R related diseases
TCONS_00020285	Ovary	Ovary related diseases
TCONS_00020286	Kidney	Kidney related diseases
TCONS_00020330	Prostate	Prostate related diseases
TCONS_00020339	Breast	Breast related diseases
TCONS_00020342	Testes	Testes related diseases
TCONS_00020348	Heart	Heart related diseases
TCONS_00020725	LymphNode	LymphNode related diseases
TCONS_00020728	Testes	Testes related diseases
TCONS_00020729	Testes	Testes related diseases
TCONS_00020358	Testes	Testes related diseases
TCONS_00020359	Testes	Testes related diseases
TCONS_00020751	Heart	Heart related diseases
TCONS_00020373	Kidney	Kidney related diseases
TCONS_00020757	Testes_R	Testes_R related diseases
TCONS_l2_00005589	Testes	Testes related diseases
TCONS_00020208	Testes	Testes related diseases
TCONS_00020378	Testes	Testes related diseases
TCONS_00020759	Testes	Testes related diseases
TCONS_00021098	Testes_R	Testes_R related diseases
TCONS_00020186	Testes_R	Testes_R related diseases
TCONS_00021099	Testes_R	Testes_R related diseases
TCONS_00021100	Testes_R	Testes_R related diseases
TCONS_00021101	Testes_R	Testes_R related diseases
TCONS_00020384	Testes	Testes related diseases
TCONS_00020765	Colon	Colon related diseases
TCONS_00021112	Heart	Heart related diseases
TCONS_00020397	Kidney	Kidney related diseases
TCONS_00020424	Testes	Testes related diseases
TCONS_00020432	Testes_R	Testes_R related diseases
TCONS_00020434	Testes	Testes related diseases
TCONS_00020438	Testes	Testes related diseases
TCONS_l2_00006273	Testes	Testes related diseases
TCONS_00020814	Testes	Testes related diseases
TCONS_00020450	Testes	Testes related diseases
TCONS_00020451	Brain	Brain related diseases
TCONS_l2_00006293	Brain	Brain related diseases
TCONS_00020454	Brain	Brain related diseases
TCONS_00020211	Testes	Testes related diseases
TCONS_00020823	Testes	Testes related diseases
TCONS_00020825	Testes	Testes related diseases
TCONS_00020826	Testes	Testes related diseases
TCONS_00021156	Testes	Testes related diseases
TCONS_00020465	LymphNode	LymphNode related diseases
TCONS_00020467	LymphNode	LymphNode related diseases
TCONS_00020471	Testes	Testes related diseases
TCONS_00020846	Brain	Brain related diseases
TCONS_00020472	Prostate	Prostate related diseases
TCONS_00020847	HLF_r1	HLF_r1 related diseases
TCONS_00020475	LymphNode	LymphNode related diseases
TCONS_00020480	Testes	Testes related diseases
TCONS_00020481	Testes	Testes related diseases
TCONS_00020490	Testes	Testes related diseases
TCONS_l2_00005788	Heart	Heart related diseases
TCONS_l2_00005793	Kidney	Kidney related diseases
TCONS_00020858	Liver	Liver related diseases
TCONS_00020859	Heart	Heart related diseases
TCONS_l2_00006345	Whitebloodcell	Whitebloodcell related diseases
TCONS_00020860	Testes	Testes related diseases
TCONS_00020861	Testes	Testes related diseases
TCONS_00020510	Testes	Testes related diseases
TCONS_00020867	Testes	Testes related diseases
TCONS_00020888	Testes	Testes related diseases
TCONS_00020893	Adrenal	Adrenal related diseases
TCONS_00020235	Testes	Testes related diseases
TCONS_00020542	Testes	Testes related diseases
TCONS_00020549	Testes	Testes related diseases
TCONS_00020551	Adrenal	Adrenal related diseases
TCONS_00020904	Testes	Testes related diseases
TCONS_00020905	Kidney	Kidney related diseases
TCONS_00020558	Testes	Testes related diseases
TCONS_00020559	Brain	Brain related diseases
TCONS_00020921	Testes	Testes related diseases
TCONS_00020922	Testes	Testes related diseases
TCONS_00020565	Liver	Liver related diseases
TCONS_00020575	Testes	Testes related diseases
TCONS_00020935	Liver	Liver related diseases
TCONS_00020577	Colon	Colon related diseases
TCONS_00020939	Testes	Testes related diseases
TCONS_00020580	Testes	Testes related diseases
TCONS_00020585	Liver	Liver related diseases
TCONS_00020595	Testes_R	Testes_R related diseases
TCONS_00021224	Testes_R	Testes_R related diseases
TCONS_00020963	Testes	Testes related diseases
TCONS_00020964	Whitebloodcell	Whitebloodcell related diseases
TCONS_00020614	Colon	Colon related diseases
TCONS_00020615	Testes	Testes related diseases
TCONS_00020967	Testes	Testes related diseases
TCONS_00020626	Testes	Testes related diseases
TCONS_00020971	Testes	Testes related diseases
TCONS_00020972	Testes	Testes related diseases
TCONS_00020982	LymphNode	LymphNode related diseases
TCONS_00020984	Testes	Testes related diseases
TCONS_00020988	Testes	Testes related diseases
TCONS_00020990	Testes_R	Testes_R related diseases
TCONS_00020991	Colon	Colon related diseases
TCONS_00020647	Testes_R	Testes_R related diseases
TCONS_00021256	Testes_R	Testes_R related diseases
TCONS_00020179	Prostate	Prostate related diseases
TCONS_00021003	Testes	Testes related diseases
TCONS_00021007	Prostate	Prostate related diseases
TCONS_00020661	Kidney	Kidney related diseases
TCONS_00021710	Heart	Heart related diseases
TCONS_00021788	Heart	Heart related diseases
TCONS_00021796	HLF_r1	HLF_r1 related diseases
TCONS_l2_00007568	Testes	Testes related diseases
TCONS_00021823	Testes	Testes related diseases
TCONS_00022050	Testes	Testes related diseases
TCONS_00022293	Testes	Testes related diseases
TCONS_00021853	Heart	Heart related diseases
TCONS_00021500	Testes	Testes related diseases
TCONS_00021855	Testes	Testes related diseases
TCONS_00021863	Lung	Lung related diseases
TCONS_l2_00006958	Testes	Testes related diseases
TCONS_00021887	Testes	Testes related diseases
TCONS_00021699	Breast	Breast related diseases
TCONS_l2_00006694	Testes	Testes related diseases
TCONS_00021526	Testes	Testes related diseases
TCONS_00021527	Testes	Testes related diseases
TCONS_l2_00007060	Testes	Testes related diseases
TCONS_00021711	Testes	Testes related diseases
TCONS_00021712	Prostate	Prostate related diseases
TCONS_00021528	Testes	Testes related diseases
TCONS_00021715	Testes	Testes related diseases
TCONS_00021716	HLF_r1	HLF_r1 related diseases
TCONS_00021727	Testes	Testes related diseases
TCONS_00022143	Heart	Heart related diseases
TCONS_l2_00007372	Testes	Testes related diseases
TCONS_00021735	Breast	Breast related diseases
TCONS_00021948	Testes	Testes related diseases
TCONS_00021737	Testes	Testes related diseases
TCONS_00021740	Testes_R	Testes_R related diseases
TCONS_00021616	Lung	Lung related diseases
TCONS_00021747	Testes	Testes related diseases
TCONS_00021749	Prostate	Prostate related diseases
TCONS_00021967	Testes	Testes related diseases
TCONS_00021754	Testes	Testes related diseases
TCONS_00021483	Adipose	Adipose related diseases
TCONS_00022157	Testes_R	Testes_R related diseases
TCONS_00021761	Testes_R	Testes_R related diseases
TCONS_00021540	Testes	Testes related diseases
TCONS_00021765	Adrenal	Adrenal related diseases
TCONS_00021769	LymphNode	LymphNode related diseases
TCONS_00021981	HLF_r1	HLF_r1 related diseases
TCONS_00021642	Kidney	Kidney related diseases
TCONS_00021545	Testes	Testes related diseases
TCONS_00021781	Testes	Testes related diseases
TCONS_00022273	Testes	Testes related diseases
TCONS_00021994	Testes	Testes related diseases
TCONS_00021999	Adrenal	Adrenal related diseases
TCONS_l2_00007538	Adrenal	Adrenal related diseases
TCONS_l2_00007175	Adrenal	Adrenal related diseases
TCONS_l2_00007539	Adrenal	Adrenal related diseases
TCONS_l2_00007546	Testes	Testes related diseases
TCONS_00022023	Brain	Brain related diseases
TCONS_00021795	Testes	Testes related diseases
TCONS_00021797	Testes	Testes related diseases
TCONS_00022031	Liver	Liver related diseases
TCONS_00021807	Testes	Testes related diseases
TCONS_00021559	Testes	Testes related diseases
TCONS_00021808	Testes	Testes related diseases
TCONS_00021560	Testes	Testes related diseases
TCONS_00022037	Testes	Testes related diseases
TCONS_00021809	Testes	Testes related diseases
TCONS_00021665	Testes	Testes related diseases
TCONS_00022290	Testes	Testes related diseases
TCONS_00022040	Testes	Testes related diseases
TCONS_00022041	Testes	Testes related diseases
TCONS_00022042	Kidney	Kidney related diseases
TCONS_l2_00007569	Testes	Testes related diseases
TCONS_00022046	Testes	Testes related diseases
TCONS_00021813	Testes	Testes related diseases
TCONS_00021814	Heart	Heart related diseases
TCONS_00021818	Testes	Testes related diseases
TCONS_00021821	Brain	Brain related diseases
TCONS_00021825	Testes	Testes related diseases
TCONS_00021835	Testes	Testes related diseases
TCONS_00021854	Testes	Testes related diseases
TCONS_00021860	Thyroid	Thyroid related diseases
TCONS_00021862	Testes	Testes related diseases
TCONS_00021578	Testes	Testes related diseases
TCONS_00022069	Brain	Brain related diseases
TCONS_00021864	Testes	Testes related diseases
TCONS_00022070	Testes	Testes related diseases
TCONS_00021579	Lung	Lung related diseases
TCONS_l2_00007579	Testes	Testes related diseases
TCONS_l2_00007277	Testes	Testes related diseases
TCONS_00022078	Testes	Testes related diseases
TCONS_00022208	Brain	Brain related diseases
TCONS_00021868	Testes	Testes related diseases
TCONS_00021477	Kidney	Kidney related diseases
TCONS_l2_00007590	Kidney	Kidney related diseases
TCONS_l2_00007287	Kidney	Kidney related diseases
TCONS_l2_00007286	Kidney	Kidney related diseases
TCONS_l2_00007591	Kidney	Kidney related diseases
[truncated: 12,214 more rows]

## Sheet: Sheet2
1
2
3
4
5
