# Supplementary material for: A Computational Framework to Infer Human Disease-Associated Long Noncoding RNAs
Source: PLoS One. 2014 Jan 2;9(1):e84408. doi: 10.1371/journal.pone.0084408 (PMC3879311; doi:10.1371/journal.pone.0084408)
Supplement: Table S5 — 51762 associations between 7303 genes and 5150 diseases retrieved from the DisGeNET database. (XLS) [file pone.0084408.s005.xls]

## Sheet: Sheet1
Gene Entrez ID	Disease ID
1	143
2	32
2	38
2	47
2	78
2	90
2	106
2	107
2	116
2	167
2	201
2	208
2	261
2	270
2	341
2	386
2	1697
2	1758
2	1886
2	2363
9	32
9	38
9	48
9	49
9	51
9	56
9	59
9	63
9	74
9	75
9	80
9	81
9	84
9	87
9	97
9	102
9	104
9	113
9	120
9	143
9	147
9	227
9	358
9	1420
10	32
10	38
10	47
10	48
10	49
10	51
10	56
10	59
10	63
10	74
10	75
10	78
10	80
10	81
10	84
10	87
10	90
10	97
10	102
10	104
10	106
10	110
10	115
10	124
10	141
10	149
10	157
10	168
10	183
10	188
10	190
10	195
10	198
10	199
10	202
10	235
10	257
10	304
10	308
10	351
10	402
10	411
10	435
10	446
10	455
10	485
10	510
10	557
10	603
10	720
10	733
10	763
10	835
10	915
10	949
10	983
10	984
10	1381
10	1410
10	1412
10	1447
10	1575
10	1732
10	2184
12	32
12	38
12	47
12	48
12	51
12	84
12	90
12	107
12	110
12	113
12	115
12	116
12	120
12	124
12	144
12	229
12	233
12	237
12	250
12	271
12	297
12	389
12	449
12	554
12	1213
12	1773
15	46
15	1809
15	3225
16	4876
18	189
18	220
18	241
18	1351
18	1803
18	1845
18	2857
19	104
19	107
19	110
19	116
19	124
19	141
19	144
19	147
19	157
19	175
19	209
19	224
19	259
19	288
19	313
19	376
19	506
19	615
19	653
19	675
19	699
19	786
19	994
19	999
19	1614
19	3437
19	3880
19	5074
20	107
21	185
21	467
21	1401
21	4648
22	222
22	228
22	311
22	3887
23	167
24	168
24	175
24	184
24	395
24	1008
24	1036
24	1311
24	1908
24	4196
24	4327
24	4528
25	32
25	59
25	75
25	84
25	104
25	107
25	143
25	183
25	184
25	185
25	188
25	189
25	322
25	346
25	348
25	563
25	591
25	669
25	721
25	792
25	815
25	1222
25	1338
25	1372
26	144
26	195
26	427
26	924
28	38
28	48
28	75
28	116
28	157
28	198
28	199
28	202
28	255
28	535
28	628
28	956
28	1596
29	936
30	2348
31	104
31	208
32	209
33	223
34	216
34	528
34	749
34	1830
34	2435
35	216
35	279
35	1778
35	2865
36	144
36	220
36	4479
37	223
37	439
38	38
38	144
38	224
38	362
38	3402
39	38
39	227
40	90
40	220
40	470
41	229
41	233
41	432
41	586
41	779
41	1433
43	32
43	59
43	90
43	107
43	235
43	237
43	241
43	254
43	418
43	443
43	462
43	701
43	702
43	1047
43	1595
47	32
47	208
48	256
48	750
48	1210
48	1665
50	59
50	250
51	208
51	3470
51	4034
52	117
52	141
52	254
52	255
52	257
52	259
52	261
52	404
52	495
52	496
52	566
52	574
52	804
52	896
52	1785
53	3171
54	47
54	104
54	113
54	270
54	271
54	360
54	474
54	1657
54	1850
54	3007
54	3821
55	38
55	104
55	381
55	382
55	1794
58	271
58	279
58	298
58	3061
58	3557
59	13
59	268
59	548
59	726
59	2327
59	4670
59	5235
60	84
60	208
60	303
60	748
60	755
60	3938
70	298
70	315
70	369
70	442
70	901
70	1064
70	1847
70	4783
70	4842
70	5128
71	250
71	303
71	304
71	4296
72	308
72	309
72	454
72	513
81	51
81	309
81	385
81	611
81	661
81	2788
87	257
87	1158
88	315
88	4779
90	48
90	497
90	905
90	1133
90	1547
92	38
92	59
92	254
92	308
92	1742
93	1949
93	2343
93	4087
93	5201
94	144
94	291
94	375
94	430
94	471
94	573
94	1240
94	1434
94	2366
94	3713
95	3599
100	32
100	48
100	80
100	113
100	157
100	220
100	224
100	256
100	308
100	341
100	346
100	501
100	667
100	1017
100	1041
100	1087
100	1162
100	1647
100	1696
100	1717
100	2084
100	2837
100	4410
101	32
101	48
101	84
101	143
101	202
102	38
102	84
102	104
102	107
102	198
102	254
102	271
102	314
102	351
102	770
103	80
103	113
103	184
103	310
103	2976
104	115
104	310
104	332
104	373
104	718
104	807
105	358
107	363
107	364
111	141
111	144
112	362
112	428
113	185
113	250
114	363
114	364
114	899
115	340
116	32
116	38
116	113
116	250
116	254
116	369
116	405
116	1057
116	2318
117	32
117	38
117	84
117	254
118	116
118	141
118	144
118	157
118	174
118	208
118	233
118	287
118	313
118	346
118	373
118	376
118	385
118	386
118	389
118	390
118	425
118	426
118	445
118	472
118	483
118	502
118	630
118	643
118	988
118	1164
118	1290
118	2365
119	144
119	390
119	887
120	144
120	480
123	227
123	256
123	351
123	395
123	511
123	525
125	59
125	74
125	84
125	104
125	111
125	157
125	167
125	178
125	183
125	198
125	402
125	404
125	405
125	413
125	415
125	416
125	419
125	478
125	789
125	1119
125	2142
125	3304
126	32
126	74
126	84
126	90
126	104
126	141
126	149
126	178
126	198
126	376
126	402
126	405
126	411
126	413
126	415
126	416
126	420
126	461
126	1217
126	1334
127	90
127	178
127	358
127	418
127	2171
128	32
128	48
128	202
128	250
130	183
130	198
131	74
131	84
131	144
131	183
131	351
131	402
131	419
131	420
132	59
132	96
132	256
132	2824
133	38
133	51
133	104
133	113
133	115
133	116
133	141
133	144
133	184
133	198
133	202
133	208
133	220
133	233
133	250
133	256
133	271
133	286
133	287
133	308
133	309
133	373
133	385
133	390
133	418
133	425
133	426
133	427
133	428
133	430
133	432
133	439
133	443
133	448
133	524
133	614
133	637
133	648
133	727
133	777
133	820
133	875
133	877
133	1071
133	1130
133	1591
133	1669
133	1834
133	1920
133	2059
133	3031
134	315
134	363
134	432
134	446
134	448
134	449
134	456
134	463
134	635
134	771
134	2472
135	48
135	115
135	241
135	267
135	358
135	363
135	364
135	369
135	418
135	432
135	446
135	448
135	454
135	455
135	462
135	463
135	492
135	526
135	1245
135	1258
135	1568
135	2011
135	3563
136	104
136	144
136	256
136	308
140	59
140	104
140	208
140	254
140	432
142	32
142	38
142	47
142	48
142	51
142	75
142	80
142	84
142	90
142	104
142	107
142	113
142	115
142	116
142	141
142	147
142	184
142	203
142	208
142	233
142	239
142	271
142	313
142	346
142	427
142	467
142	470
142	472
142	474
142	567
142	610
142	687
142	871
142	1077
142	1231
142	1419
142	2149
143	254
143	351
146	224
146	533
147	224
147	241
147	427
147	448
147	472
147	480
147	1086
148	38
148	106
148	144
148	224
148	250
148	536
148	620
148	1294
150	141
150	144
150	261
150	331
150	448
150	492
150	495
150	496
150	520
150	575
150	583
150	612
150	716
150	1244
150	1271
150	1508
150	1733
151	116
151	141
151	144
151	261
151	373
151	497
151	530
152	315
152	428
152	1384
153	107
153	110
153	116
153	144
153	261
153	315
153	346
153	362
153	369
153	373
153	428
153	449
153	463
153	501
153	502
153	506
153	512
153	621
153	629
153	2120
154	38
154	47
154	48
154	59
154	78
154	104
154	107
154	110
154	113
154	115
154	116
154	141
154	143
154	144
154	147
154	184
154	220
154	233
154	259
154	261
154	270
154	308
154	315
154	346
154	362
154	373
154	428
154	438
154	448
154	449
154	481
154	496
154	497
154	506
154	510
154	511
154	512
154	520
154	526
154	528
154	530
154	533
154	535
154	618
154	623
154	654
154	663
154	680
154	700
154	776
154	989
154	1027
154	1044
154	1072
154	1118
154	1171
154	1250
154	1407
154	1538
154	1666
154	1985
154	2024
155	47
155	59
155	110
155	113
155	141
155	144
155	157
155	254
155	259
155	261
155	308
155	362
155	376
155	425
155	428
155	520
155	524
155	528
155	536
155	576
155	577
155	679
155	719
155	992
155	1177
156	47
156	107
156	111
156	144
156	362
156	369
156	427
156	1067
156	2790
157	340
158	220
158	2238
158	2604
159	250
164	590
165	1396
174	84
174	97
174	104
174	188
174	208
174	256
174	330
174	418
174	548
174	599
174	646
174	980
174	1275
175	1565
175	2628
176	47
176	128
176	250
176	554
176	833
176	892
176	898
176	1255
176	1651
176	1686
176	3797
176	4841
177	32
177	38
177	47
177	51
177	59
177	78
177	104
177	107
177	110
177	113
177	115
177	116
177	120
177	141
177	143
177	157
177	174
177	198
177	201
177	202
177	229
177	233
177	255
177	271
177	309
177	313
177	346
177	373
177	376
177	385
177	425
177	435
177	454
177	472
177	506
177	519
177	554
177	563
177	566
177	567
177	574
177	576
177	577
177	608
177	609
177	638
177	682
177	705
177	729
177	918
177	966
177	990
177	1128
177	1606
178	995
178	996
181	110
181	252
181	261
181	583
182	38
182	47
182	51
182	75
182	84
182	104
182	208
182	270
182	271
182	338
182	360
182	443
182	470
182	554
182	584
182	586
182	590
182	591
182	599
182	641
182	686
182	695
182	710
182	730
182	809
182	846
182	1054
182	2212
182	2606
182	3469
183	84
183	110
183	113
183	116
183	122
183	141
183	144
183	157
183	174
183	179
183	198
183	209
183	210
183	224
183	226
183	233
183	234
183	239
183	241
183	255
183	261
183	263
183	270
183	286
183	288
183	308
183	309
183	313
183	314
183	340
183	341
183	346
183	351
183	362
183	373
183	376
183	385
183	386
183	390
183	402
183	418
183	425
183	426
183	427
183	428
183	430
183	442
183	445
183	448
183	454
183	456
183	472
183	478
183	497
183	501
183	506
183	520
183	536
183	588
183	599
183	608
183	609
183	610
183	611
183	612
183	614
183	615
183	618
183	620
183	621
183	628
183	629
183	630
183	635
183	636
183	637
183	638
183	642
183	644
183	645
183	651
183	657
183	659
183	660
183	769
183	884
183	951
183	1063
183	1117
183	1198
183	1251
183	1292
183	1511
183	1873
185	104
185	113
185	116
185	117
185	141
185	144
185	157
185	159
185	161
185	209
185	224
185	229
185	233
185	288
185	308
185	309
185	313
185	341
185	351
185	373
185	376
185	385
185	386
185	389
185	390
185	418
185	426
185	427
185	428
185	430
185	438
185	442
185	443
185	454
185	472
185	506
185	573
185	576
185	609
185	612
185	620
185	628
185	630
185	641
185	642
185	643
185	644
185	645
185	646
185	648
185	651
185	653
185	654
185	657
185	659
185	660
185	661
185	663
185	668
185	672
185	673
185	704
185	741
185	743
185	1212
185	1668
185	2165
186	5
186	104
186	144
186	159
186	269
186	277
186	308
186	362
186	376
186	382
186	386
186	426
186	428
186	432
186	472
186	574
186	646
186	667
186	668
186	669
186	672
186	673
186	900
186	1022
186	1204
186	2094
189	1188
189	2618
190	51
190	84
190	144
190	149
190	160
190	679
190	680
190	849
190	2395
190	2444
190	3997
191	196
191	254
191	628
191	1672
191	5202
196	32
196	47
196	49
196	78
196	84
196	104
196	111
196	113
196	143
196	144
196	147
196	188
196	202
196	256
196	257
196	351
196	370
196	548
196	644
196	654
196	686
196	687
196	712
196	722
196	739
196	1006
196	1028
196	1052
196	1145
196	1206
196	1350
196	1731
196	1979
196	5014
197	107
197	110
197	113
197	116
197	141
197	184
197	224
197	233
197	257
197	261
197	313
197	373
197	376
197	407
197	425
197	445
197	472
197	511
197	583
197	695
197	699
197	700
197	701
197	717
197	793
197	1058
197	2031
199	47
199	104
199	141
199	261
199	288
199	702
199	704
199	767
202	229
202	233
202	705
203	213
203	250
203	4721
204	710
204	1644
204	2757
207	32
207	38
207	51
207	59
207	75
207	84
207	97
207	104
207	120
207	143
207	144
207	149
207	183
207	184
207	185
207	188
207	192
207	198
207	202
207	227
207	235
207	250
207	254
207	256
207	271
207	310
207	312
207	313
207	322
207	351
207	380
207	399
207	425
207	429
207	443
207	455
207	462
207	470
207	474
207	497
207	519
207	563
207	599
207	644
207	679
207	704
207	705
207	716
207	717
207	718
207	719
207	721
207	722
207	726
207	727
207	729
207	730
207	733
207	739
207	741
207	805
207	806
207	810
207	857
207	868
207	873
207	876
207	882
207	894
207	932
207	940
207	943
207	1343
207	1453
207	1551
207	2211
208	38
208	84
208	104
208	110
208	141
208	143
208	198
208	202
208	208
208	443
208	470
208	719
208	743
210	184
210	208
210	241
210	1224
210	1327
210	2000
210	2653
211	228
211	749
211	1775
212	228
212	750
212	1000
212	2451
212	4797
213	102
213	141
213	144
213	157
213	208
213	210
213	224
213	229
213	233
213	237
213	245
213	263
213	279
213	313
213	341
213	373
213	376
213	378
213	385
213	418
213	424
213	428
213	448
213	472
213	491
213	511
213	577
213	599
213	603
213	610
213	620
213	621
213	674
213	696
213	716
213	727
213	749
213	763
213	767
213	769
213	776
213	777
213	779
213	845
213	971
213	979
213	981
213	997
213	1095
213	1121
213	1125
213	1143
213	1149
213	1479
213	1586
213	1594
213	1862
213	1926
213	2488
213	2826
213	3330
213	4360
214	38
214	49
214	59
214	84
214	104
214	198
214	271
214	443
214	705
215	124
215	313
215	786
215	799
215	1965
216	84
216	147
216	178
216	188
216	202
216	418
216	510
217	32
217	48
217	59
217	84
217	87
217	107
217	116
217	144
217	149
217	178
217	183
217	198
217	202
217	208
217	255
217	377
217	405
217	411
217	413
217	415
217	416
217	418
217	461
217	548
217	695
217	739
217	789
217	792
217	793
217	920
217	1404
217	1448
217	2231
217	4699
218	32
218	1632
219	418
220	351
224	1950
225	799
226	104
226	271
226	2755
229	102
229	141
229	195
229	941
229	1132
230	250
231	110
231	141
231	155
231	174
231	254
231	255
231	259
231	309
231	313
231	346
231	432
231	577
231	609
238	32
238	51
238	81
238	84
238	143
238	250
238	435
238	717
238	718
238	722
238	804
238	805
238	806
238	807
238	1241
238	1361
238	4952
239	32
239	38
239	49
239	59
239	84
239	104
239	107
239	144
239	147
239	149
239	198
239	340
239	614
239	695
239	809
239	810
240	38
240	48
240	49
240	59
240	84
240	104
240	107
240	113
240	116
240	143
240	149
240	183
240	184
240	202
240	254
240	271
240	313
240	351
240	430
240	443
240	451
240	552
240	555
240	574
240	614
240	678
240	717
240	721
240	776
240	810
240	820
240	843
240	919
240	925
240	933
240	934
240	948
240	1115
240	1122
240	2317
240	2900
241	48
241	116
241	157
241	233
241	256
241	313
241	385
241	432
241	480
241	548
241	720
241	1229
242	676
242	2179
242	4133
246	38
246	48
246	49
246	51
246	59
246	75
246	84
246	104
246	107
246	143
246	149
246	157
246	183
246	254
246	256
246	313
246	673
246	695
246	741
248	195
248	603
249	38
249	113
249	241
249	472
249	548
249	695
249	833
249	835
249	935
249	937
249	1183
249	1218
249	1659
249	2437
249	2668
249	2669
250	84
250	891
250	1237
257	4580
258	2944
259	38
259	51
259	84
259	102
259	199
259	271
259	474
259	843
259	845
259	1053
259	2214
262	38
262	340
265	193
265	3888
268	38
268	257
268	443
268	497
268	849
268	855
268	856
268	1026
268	1184
269	84
269	497
269	855
269	856
269	1452
269	1470
270	47
270	157
270	279
270	376
270	428
270	432
270	438
270	467
270	506
270	520
270	700
270	857
270	1134
270	2063
270	3331
270	5066
272	4986
273	32
274	38
274	104
274	107
274	113
274	188
274	254
274	380
274	461
274	705
274	2239
274	2988
275	2697
279	167
283	38
283	51
283	59
283	113
283	139
283	185
283	203
283	227
283	256
283	257
283	474
283	525
283	868
283	880
283	1056
283	2116
283	4812
284	48
284	51
284	84
284	113
284	143
284	157
284	183
284	208
284	256
284	257
284	310
284	351
284	430
284	454
284	506
284	644
284	687
284	717
284	873
284	875
284	876
284	877
284	881
284	883
284	1395
285	32
285	51
285	84
285	97
285	104
285	113
285	143
285	144
285	157
285	185
285	188
285	208
285	256
285	257
285	271
285	308
285	351
285	470
285	590
285	687
285	741
285	873
285	875
285	876
285	877
285	880
285	881
285	882
285	883
285	884
285	1019
285	1113
286	361
286	887
286	1558
287	286
287	335
287	612
287	635
287	1176
287	2058
287	4625
288	107
288	340
288	892
288	1168
288	1602
290	32
290	51
290	75
290	143
290	144
290	184
290	185
290	208
290	705
290	721
290	722
290	880
290	894
290	1683
291	898
291	899
291	900
291	901
291	1630
291	2310
291	3571
291	3626
292	104
301	32
301	38
301	47
301	49
301	74
301	84
301	104
301	113
301	143
301	183
301	198
301	199
301	257
301	386
301	472
301	548
301	638
301	733
301	910
301	912
301	923
301	1987
302	38
302	48
302	51
302	84
302	104
302	143
302	185
302	188
302	199
302	202
302	208
302	209
302	271
302	524
302	528
302	657
302	726
302	910
302	912
302	1076
302	1080
302	1097
302	1427
302	1613
306	38
306	443
307	38
307	185
307	188
307	227
307	792
308	116
308	118
308	143
308	185
308	308
308	351
308	432
308	528
308	530
308	612
308	623
308	726
308	820
308	915
308	1079
308	1781
309	185
310	84
310	351
311	918
313	48
313	462
317	51
317	59
317	75
317	84
317	143
317	185
317	199
317	227
317	235
317	271
317	346
317	348
317	351
317	563
317	705
317	721
317	722
317	846
317	919
317	923
317	1457
317	1576
317	1829
318	104
320	107
320	632
321	250
322	107
322	124
322	925
323	107
323	528
324	32
324	38
324	51
324	56
324	59
324	84
324	104
324	143
324	149
324	155
324	188
324	198
324	208
324	220
324	235
324	250
324	254
324	259
324	326
324	351
324	357
324	380
324	411
324	434
324	435
324	461
324	555
324	557
324	560
324	616
324	628
324	667
324	679
324	705
324	717
324	733
324	846
324	906
324	932
324	933
324	936
324	937
324	940
324	943
324	948
324	951
324	961
324	973
324	982
324	1082
324	1264
324	1267
324	1340
324	1411
324	1466
324	1584
324	1769
324	2319
324	2383
324	2390
[truncated: 49,763 more rows]
